## Hippocampus-lateral septum circuitry mediates foraging-related spatial memory in rats

Elizabeth A. Davis<sup>1\*</sup>, Clarissa M. Liu<sup>1,2\*</sup>, Isabella H. Gianatiempo<sup>1</sup>, Andrea N. Suarez<sup>1</sup>, Alyssa M. Cortella<sup>1</sup>, Joel D. Hahn<sup>3</sup>, and Scott E. Kanoski<sup>1,2</sup>

\*These two authors contributed equally

<sup>1</sup>Human and Evolutionary Biology Section, Department of Biological Sciences, Dornsife College of Letters, Arts and Sciences, University of Southern California, 3616 Trousdale Pkwy, Los Angeles, CA, USA, 90089; <sup>2</sup>Neuroscience Graduate Program, University of Southern California, 3641 Watt Way, Los Angeles, CA, USA. 90089; <sup>3</sup>Neurobiology Section, Department of Biological Sciences, Dornsife College of Letters, Arts and Sciences, University of Southern California, 3616 Trousdale Pkwy, Los Angeles, CA, USA, 90089

Corresponding author:

Scott E. Kanoski, PhD

University of Southern California

3616 Trousdale Parkway, AHF-252

Los Angeles, CA 90089-0372

Phone: 213-821-5762

Email: [kanoski@usc.edu](mailto:kanoski@usc.edu)

Classification: Biological Sciences, Neuroscience

Keywords: feeding, cognition, place cells, motivation, reward, foraging, lateral hypothalamic area, prefrontal cortex

1 **ABSTRACT**

2  
3  
4  
5  
6  
7  
8  
9  
10  
11  
12  
13  
14  
15  
16  
17  
18  
19  
20  
21  
22  
23  
24  
25  
26  
27  
28  
29  
30  
31

Remembering the location of a food or water source is essential for survival. Here we identify a hippocampal-septal neural circuit that is necessary for spatial memory based specifically on appetitive reinforcement. Both reversible and chronic disconnection of ventral hippocampus CA1 subregion (CA1v) projections to the lateral-septum (LS) using pathway-specific dual viral approaches impaired spatial memory retention for the location of either food or water reinforcement. However, disconnection of this pathway did not affect performance in an aversive escape-motivated spatial memory task that used the same apparatus and visuospatial cues. The selectivity of this pathway in mediating foraging-related spatial memory was further supported by results showing that CA1v-LS disconnection did not affect anxiety-like behavior, locomotor activity, or social and olfactory-based appetitive learning. To examine whether CA1v-LS mediation of foraging-related spatial memory involves collateral projections of CA1v neurons, we utilized virus-based neural pathway tracing analyses to identify the medial prefrontal cortex (mPFC) as a collateral target of LS-projecting CA1v neurons. However, functional disconnection of CA1v and mPFC did not affect appetitive spatial memory, thus further supporting the selectivity of CA1v-LS signaling for this behavior. The nucleus accumbens, lateral hypothalamic area, and other brain regions associated with food motivation and reward were identified as second-order targets of CA1v-LS signaling using a multisynaptic anterograde tracing approach. Collective results reveal that CA1v to LS communication plays a critical role in remembering an environmental location based on appetitive (food or water) but not aversive (escape) reinforcement, thus identifying a novel neural pathway regulating foraging-related memory processes.



32

## 33 INTRODUCTION

34

35 A survival advantage common to early humans and lower-order mammals is to accurately  
36 remember the location of a food or water source in the environment, and to then efficiently  
37 navigate back to a shelter or other safe location. The neurobiological substrates that regulate  
38 visuospatial navigation are therefore critical to effectively implement food-directed or water-  
39 directed foraging behavior. In rodents a number of maze tasks have been developed for studying  
40 spatial memory and navigation, including the widely popular Morris water maze that requires  
41 animals to swim and navigate to a submerged escape platform using distal visuospatial cues as a  
42 guide (1). The conceptually similar Barnes maze task requires animals to learn and recall a  
43 location for escaping mildly aversive stimuli (bright lights, loud noises) (2). These and other  
44 tasks have been instrumental in identifying brain structures within the telencephalon that are  
45 essential for visuospatial mapping and egocentric orientation in the environment, including the  
46 hippocampus and the medial entorhinal cortex, respectively (3, 4). However, despite that reliably  
47 locating food and water sources in the environment is a key selection pressure driving evolution  
48 of visuospatial navigation, the overwhelming majority of rodent model research on the substrates  
49 of spatial learning and memory have utilized procedures such as the Morris water maze and the  
50 Barnes maze that each involve escaping aversive reinforcement (5, 6). Furthermore, while single  
51 unit recordings have been used to identify specific populations of neurons that subserv distinct  
52 navigational functions (e.g., hippocampal “place cells”, medial entorhinal “grid cells”) (7, 8), the  
53 bulk of this research has recorded neural activity under neutral conditions void of either  
54 appetitive or aversive reinforcement. Very little research has been dedicated to identify brain  
55 regions and neural circuits that may specifically promote spatial memory based on the location of  
56 appetitive reinforcers (e.g., food, water), as well as the extent to which the nature of the  
57 reinforcement is a critical factor in deciphering the brain’s control of visuospatial navigation.

58 The majority of rodent model research investigating brain regions that mediate  
59 visuospatial navigational memory has focused on the anterior and “dorsal” subregion of the  
60 hippocampus (septal pole; HPCd). However, the posterior and “ventral” hippocampus subregion  
61 (temporal pole; HPCv), while classically associated with stress- and affect-associated memory  
62 processes (9), also plays a role in visuospatial learning and memory (10-12). For example, under

63 some testing conditions selective HPCv lesions impair spatial memory performance in the Morris  
64 water maze (12, 13). Moreover, place cells that are responsive to changes in the visuospatial  
65 environment are present within both the HPCd and HPCv pyramidal layers, with a linear  
66 increase in the scale of representation from the dorsal to the ventral pole (11). Despite a common  
67 role for the HPCd and HPCv in mediating spatial memory, there is also evidence for a functional  
68 distinction between the subregions (9, 14, 15). For instance, lesions of the HPCv but not the  
69 HPCd alter stress responses (16) and anxiety-like behavior (17), whereas HPCd but not HPCv  
70 lesions impair spatial memory in an incidental (nonreinforced) procedure (18). These two HPC  
71 subregions also have distinct afferent and efferent neural connections. This disparate  
72 neuroanatomical connectivity supports a framework for a functional diversity in which the HPCd  
73 preferentially processes cortical-derived sensory information and the HPCv preferentially  
74 processes metabolic and limbic-derived affective information (9, 15). The functional distinction  
75 between these two subregions is further supported by the generation of the hippocampus gene  
76 expression atlas, which provides a comprehensive integration of gene expression and  
77 connectivity across the HPC axis (19). Given that both the HPCv and the HPCd participate in  
78 spatial memory but have distinct neuroanatomical connectivity and contributions when it comes  
79 to regulating other cognitive and mnemonic processes, it is feasible that the HPCv and HPCd  
80 support different forms of spatial memory depending on the type of reinforcement and/or the  
81 context associated with the behavior.

82         Recent findings identify the HPCv as a critical brain substrate in regulating feeding  
83 behavior and food-directed memory processes. Reversible inactivation of HPCv neurons after a  
84 meal increases the size of and reduces the latency to consume a subsequent meal (20, 21). In  
85 addition, receptors for feeding-related hormones are more abundantly expressed in the HPCv  
86 compared to the HPCd (e.g., ghrelin receptors (22, 23), glucagon-like peptide-1 [GLP-1]  
87 receptors (24)), and these HPCv endocrine and neuropeptide receptor systems alter food intake  
88 and feeding-related memory (25). For example, leptin and GLP-1 act in the HPCv (CA1v  
89 subregion) to decrease food intake and food-motivated conditioned behaviors (26-28), whereas  
90 the orexigenic gut-derived hormone ghrelin administered to the HPCv but not HPCd has  
91 opposite effects (25, 29). Olfactory information, which is intimately connected with feeding  
92 behavior, is also preferentially processed within the HPCv compared with the HPCd. The CA1v,  
93 specifically, is bidirectionally connected to brain regions that process olfactory information (9,

94 30, 31), and CA1v neurons respond more robustly to olfactory contextual cues compared with  
95 CA1d (10). Further, ghrelin signaling in the CA1v improves olfactory- and socially-mediated  
96 memory for food preference (32). Given the HPCv appetite-relevant neuroanatomical  
97 connections, endocrine and neuropeptide receptor expression profiles, and functional evidence  
98 linking this subregion with food-motivated behaviors, we hypothesize that HPCv mediation of  
99 visuospatial memory is preferentially biased to food and water-reinforced foraging behavior.

100 HPCv pyramidal neurons have extensive projection targets throughout the brain (33), yet  
101 the functional relevance of these pathways is poorly understood. Recently, CA1v projections to  
102 the medial prefrontal cortex (mPFC) and lateral hypothalamic area (LHA) were found to mediate  
103 feeding-related outcomes associated with GLP-1 and ghrelin signaling, respectively (28, 34).  
104 CA1v neurons also robustly target the LS (35, 36), and a HPCv dentate gyrus-CA3v to lateral  
105 septum (LS) pathway was identified that suppresses feeding (37). However, the relevance of this  
106 pathway to feeding-related learning and memory is unknown. It is feasible that CA1v to LS  
107 projections participate in regulating spatial memory for food location, a notion supported by  
108 findings showing that neuroplastic changes occur in the LS after learning a spatial memory task  
109 (38, 39). Thus, in addition to exploring the role of the HPCv in memory for the spatial location  
110 of food or water, the present study also investigated the specific role of the CA1v to LS pathway  
111 in foraging-relevant memory processes.

112 To systematically investigate the role of the HPCv and CA1v to LS signaling in  
113 visuospatial learning and memory for food and water reinforcement, we developed two novel  
114 appetitive reinforcement-based spatial foraging behavioral tasks that allows for direct  
115 comparison with an aversive reinforcement-based task of similar difficulty that uses the same  
116 apparatus and spatial cues. Performance in these tasks was assessed following pathway-specific  
117 dual viral-based reversible (chemogenetic inhibition) or chronic (targeted apoptosis)  
118 disconnection of the CA1v to LS pathway. To further expand neural network knowledge on  
119 CA1v to LS signaling, we used conditional viral-based neuroanatomical tracing strategies to  
120 identify both first-order collateral and second-order targets of LS-projecting CA1v neurons.  
121 Collective results from the present study identify novel neural circuitry of specific relevance to  
122 foraging behavior.

123

## 124 **RESULTS**

125

126 **The ventral hippocampus (HPCv) is required for remembering the spatial location of food**

127 To examine the importance of the HPCv in memory for the spatial location of food, animals  
128 received bilateral *N*-Methyl-D-aspartate excitotoxic lesions of the HPCv (HPCv lesion n=12) or  
129 bilateral sham injections (control n=12) (histological analyses for the neuron-specific NeuN  
130 antigen in Fig. 1A) and were tested in a novel appetitive visuospatial memory task developed in  
131 our lab. Results revealed no significant differences in errors (incorrect hole investigations) (Fig.  
132 1E) or latency to locate the food source hole (Fig. 1F) during training. However, memory probe  
133 results show that animals with HPCv lesions decreased the ratio of correct + adjacent / total holes  
134 explored in the first minute compared with controls (Figure 1G;  $p < 0.05$ , cohen's  $d = -1.0174$ ).

135 Analysis for the combined 2-minute period did not yield a statistical difference between groups.

136 Post-surgical analyses of food intake (Supp. Fig. 1A) and body weight (Supp. Fig. 1B)  
137 found no group differences in these measures over time. These collective results indicate the  
138 HPCv is required for memory retention but not learning of the spatial location of food in the  
139 environment.

140

141 **Ventral hippocampus CA1 (CA1v) projections to the lateral septum (LS) mediate**  
142 **appetitive spatial memory for food and water location, but not aversive spatial memory for**  
143 **escape location**

144 A major neuroanatomical target of HPCv CA1 neurons (CA1v) is the LS (36). We investigated  
145 the functional relevance of the CA1v to LS signaling in learning and recalling the spatial location  
146 of either food or water reinforcement using conditional dual viral approaches to either reversibly  
147 (via cre-dependent pathway-specific inhibitory chemogenetics; diagram of approach in Fig. 2A)  
148 or permanently (via cre-dependent pathway-specific caspase-induced lesions; diagram of  
149 approach in Fig. 2B) disconnect CA1v to LS communication. Results from the appetitive food  
150 seeking spatial memory task reveal no significant group differences during training in either  
151 errors before locating the correct hole (Fig. 2E) or latency to locate the food source hole (Fig.  
152 2F). However, memory probe results demonstrate that both acute (pathway-specific DREADDs)  
153 and chronic (pathway-specific caspase) CA1v to LS disconnection decreased the ratio of correct  
154 + adjacent / total holes explored in the entire two minutes of the probe compared with controls

155 (Fig. 2G;  $p < 0.05$ , cohen's  $d = -1.142$ ), with a similar trend in the first minute of the probe  
156 ( $p = 0.059$ ).

157 Results from the appetitive water seeking spatial memory task in a separate cohort of rats  
158 also reveal no significant group differences during training in either errors before locating the  
159 correct hole (Fig. 2H) or latency to locate the food source hole (Fig. 2I). However, a significant  
160 impairment following either acute or chronic CA1v to LS disconnection of ratio of correct +  
161 adjacent / total holes explored in 2-min memory probe compared with controls (Fig 2J;  $p < 0.05$ ,  
162 cohen's  $d = -1.18$ ). Analysis for the first minute alone of the probe test did not yield a statistical  
163 difference between groups.

164 Histological analyses confirmed successful viral transfection of LS-projecting CA1v  
165 neurons with DREADDs (Figs. 2C&D) or caspase (Supp. Figs. 2E&F), and post-surgical  
166 analyses of food intake (Supp. Fig 2A) and body weight (Supp. Fig 2B) found no group  
167 differences in these measures over time (in the absence of CNO treatment). These data  
168 demonstrate that CA1v to LS communication is critical for remembering the spatial location of  
169 food and water, and that these effects are unlikely to be based on differences in energy status or  
170 food motivation.

171 To evaluate whether the CA1v to LS pathway is specifically involved in appetitive  
172 reinforcement-based spatial memory (food or water) vs. spatial memory in general, in a separate  
173 cohort of animals we tested the effect of reversible and chronic CA1v to LS disconnection in a  
174 spatial learning task based on aversive reinforcement rather than food. Importantly, this task uses  
175 the same apparatus and visuospatial cues as the spatial location food and water memory tasks  
176 described above, but the animals are motivated to locate the tunnel to escape mildly aversive  
177 stimuli (bright lights, loud noise) with no food or water reinforcement in the tunnel (see Fig. 1B).  
178 Training results revealed no significant group differences in errors before correct hole (Fig. 2K)  
179 nor latency to locate the escape hole (Fig. 2L). During the memory probe test, there were no  
180 group differences in the ratio of correct + adjacent / total holes investigated during the first  
181 minute nor the entire two minutes (Fig. 2M) of the memory probe. Histological analyses  
182 confirmed successful viral transfection of LS-projecting CA1v neurons with DREADDs (Figs.  
183 2C&D) or caspase (Supp. Figs. 2E&F), and post-surgical analyses of food intake (Supp. Fig. 2C)  
184 and body weight (Supp. Fig. 2D) found no group differences in these measures over time (in the  
185 absence of CNO treatment). These collective findings suggest that CA1v to LS signaling

186 specifically mediates spatial memory in a reinforcement-dependent manner, playing a role in  
187 appetitive (food or water reward) but not aversive (escape-based) spatial memory.

188

189 **Reversible, but not chronic disconnection of CA1v to LS signaling increases chow intake**  
190 **under free-feeding conditions.**

191 While the results above suggest that the impairments in food or water-based spatial  
192 memory were not based on long-term changes in food intake or body weight, these experiments  
193 were conducted under conditions of either chronic food or water restriction. To examine the role  
194 of CA1v to LS signaling on feeding behavior under free-feeding conditions, we examined meal  
195 pattern feeding analyses in the caspase vs. the control group (chronic CA1v-LS disconnection),  
196 and in the DREADDs group following CNO or vehicle (within-subjects design; reversible  
197 CA1v-LS disconnection). Results averaged over 5d revealed no significant effect of chronic  
198 CA1v to LS disconnection (caspase group) on 24h meal frequency, meal size, meal duration, or  
199 24h food intake in comparison to controls (Supp. Figs. 3A-D). However, acute and reversible  
200 silencing of LS-projecting CA1v neurons (DREADDs group; via lateral ventricular injection of  
201 the DREADD ligand CNO) significantly increased 24h chow intake (Supp. Fig. 3H;  $p < 0.05$ ,  
202 cohen's  $d = 0.10$ ) relative to vehicle treatment, accompanied by a trend towards increased meal  
203 frequency (Supp. Fig. 3E;  $p = 0.11$ ) and no effect on meal size or meal duration (Supp. Figs.  
204 3F&G). These results are unlikely based on nonselective effects of the CNO, as we've recently  
205 shown that ICV CNO injections do not affect food intake in rats when tested under similar  
206 conditions (40). Collectively these findings show that reversible CA1v to LS disconnection  
207 increases food intake under free-feeding conditions, whereas food intake is not affected by  
208 chronic CA1v to LS ablation.

209

210 **CA1v to LS disconnection does not affect nonspatial HPC-dependent appetitive memory**

211 To examine the role of CA1v to LS signaling in a nonspatial HPC-dependent food-  
212 reinforced memory task, we tested the effect of reversible and chronic CA1v to LS disconnection  
213 in the social transmission of food preference (STFP) test (diagram in Fig. 3A). The HPCv plays  
214 an important role in STFP (32, 41, 42), which tests socially-mediated food-related memory based  
215 on previous exposure to socially-communicated olfactory cues. Results revealed that there were  
216 no differences in preference ratio between groups (Fig. 3B), with all three groups performing



217 significantly above chance ( $p < 0.05$ ). These results suggest that neither acute nor chronic CA1v  
218 to LS disconnection impair food-related memory based on social-based olfactory stimuli.

219

### 220 **CA1v to LS disconnection does not affect anxiety-like behavior or levels of locomotor** 221 **activity**

222 HPCv to LS circuitry has been shown to play a role in mediating anxiety and stress behavior (43-  
223 45). Given that altered anxiety-like behavior and/or locomotion could produce behavioral  
224 changes that may lead to an apparent spatial memory deficit in any of the spatial learning tasks  
225 used, we examined whether HPCv to LS disconnection yields differences in anxiety-like  
226 behavior (zero maze task; diagram of apparatus in Fig. 3C) and/or locomotion (open field test).  
227 Results showed no significant group differences in time spent in the open zones in the zero maze  
228 test (Fig. 3D) nor in the number of open zone entries (Fig. 3E), suggesting that neither chronic  
229 nor reversible disconnection of the CA1v to LS circuitry influences anxiety-like behavior. In  
230 addition, CA1v to LS disconnection had no effect on general locomotor activity in the open field  
231 test (Fig. 3F). These results support that observed deficits in food-seeking and water-seeking  
232 spatial memory are not secondary to general differences in anxiety-like behavior or locomotor  
233 impairments in the disconnection groups.

234

### 235 **The medial prefrontal cortex is a collateral target of LS-projecting CA1v neurons**

236 In addition to the LS, CA1v neurons also robustly project to the medial prefrontal cortex  
237 (mPFC) and the lateral hypothalamic area, two pathways that we have previously shown to be  
238 involved in feeding behavior (27, 29, 34). To examine whether LS-projecting CA1v neurons  
239 have collateral targets in the mPFC, LHA, or in other brain regions, we utilized a conditional  
240 dual viral neural pathway tracing approach that identifies collateral targets of a specific  
241 monosynaptic pathway (CA1v->LS; diagram of approach in Fig. 4A, representative CA1v  
242 injection site in Fig. 4B, representative CA1v injection site in Fig. 4C). Results revealed that LS-  
243 projecting CA1v neurons also project to the mPFC (Fig. 4D), whereas no labeling was observed  
244 in the LHA, and very minimal labeling was observed in other brain regions. Thus, it may be the  
245 case that the impaired spatial memory for food location observed following either reversible or  
246 chronic CA1v to LS disconnection are based, in part, on CA1v to mPFC signaling from the same  
247 CA1v to LS projecting neurons.

248

249 **Neither CA1v to mPFC nor CA1v to LHA signaling contribute to spatial memory for food**  
250 **location**

251 We next sought to test the functional relevance to food-directed spatial memory of CA1v-  
252 originating neural pathways that either do (CA1v to mPFC) or do not (CA1v to LHA)  
253 collateralize from CA1 to LS projections. We also investigated the role of a pathway (CA1v to  
254 LHA) that is not a target of LS-projecting CA1v neurons, but has previously been associated  
255 with appetitive and consummatory aspects of feeding behavior (29, 34). Both the CA1v to mPFC  
256 and CA1v to LHA projections are exclusively ipsilateral (27, 34), and thus these pathways allow  
257 for a ‘contralesional’ approach to achieve chronic functional disconnection (diagram of approach  
258 in Fig. 4E&4I, modified from (34)). This approach was utilized in favor of the dual viral  
259 approaches used for the CA1v-LS disconnection as it does not require the use of viruses and  
260 involves fewer surgical injections to achieve a similar goal. We note that this contralesional  
261 approach is not a feasible option for the CA1v-LS pathway, as CA1v neurons project to the LS  
262 bilaterally (e.g., Fig. 5F). Post-surgical analyses of food intake (Supp. Fig. 3A,C) and body  
263 weight (Supp. Fig. 3B,D) found no group differences in these measures over time for either the  
264 CA1v-mPFC or the CA1v-LHA disconnection groups. Training results from the appetitive  
265 spatial memory task revealed no group differences in errors before locating the correct hole (Fig.  
266 4F, 4J) or latency to locate the food-baited hole (Fig. 4G, 4K) for either the CA1v-mPFC or the  
267 CA1v-LHA disconnection groups. Importantly, memory probe results demonstrate that neither  
268 CA1v to mPFC nor CA1v to LHA disconnection altered the ratio of correct + adjacent / total  
269 holes explored in the first minute or the entire two minutes (Fig. 4H, 4L) compared with  
270 controls. These data collectively demonstrate that CA1v to LS mediation of foraging-related  
271 memory does not require collateral projections to the mPFC neural pathway. Further, CA1v to  
272 LHA neural signaling, which participates in other conditioned aspects of food intake (29, 34), is  
273 not required for either learning or remembering of the spatial location of food.

274

275 **Second-order targets of CA1v to LS neurons include the mPFC, the LHA, and the ACB**

276 We used a dual viral tracing strategy (diagram of approach in Fig. 5A; representative LS  
277 injection site in Fig. 5B) to identify downstream targets of LS-projecting CA1v neurons. Results  
278 revealed that the mPFC (Fig. 5C), the LHA (Fig. 5D) and the nucleus accumbens (ACB; Fig. 5E)



279 are among the strongest second-order targets of the CA1v to LS-projecting neurons. Quantitative  
280 analyses using a custom-built data-entry platform (Axiome C, created by JDH) are summarized  
281 graphically for a representative animal on a brain flatmap summary diagram (Fig. 5F) for the  
282 hemisphere ipsilateral (top) and contralateral (bottom) to the injection sites. The data are also  
283 summarized in tabular form in Supplementary Table 1.

284

## 285 **DISCUSSION**

286 Memory for the physical location of a food or water source is adaptive for maintaining  
287 adequate energy supply for reproduction and survival. However, the neural circuits mediating  
288 this complex behavior are not well understood, as research on visuospatial memory has  
289 predominantly used tasks with either aversive or neutral/passive reinforcement. Moreover,  
290 whether the neural circuitry mediating spatial memory function is divergent based on the nature  
291 (e.g., appetitive vs. aversive) or modality (e.g., food vs. water) of the reinforcement has not been  
292 systematically investigated. The present study identified a monosynaptic CA1v to LS pathway as  
293 a necessary substrate for food- and water-motivated spatial memory. Moreover, the selectivity of  
294 the CA1v-LS pathway in mediating spatial memory for food and water location is supported by  
295 results showing that disconnection of this pathway did not affect performance in an escape-  
296 motivated spatial memory task of comparable difficulty conducted in the same apparatus,  
297 anxiety-like behavior, locomotor activity, or olfactory and social-based appetitive memory. Viral  
298 pathway tracing identified that LS-projecting CA1v neurons also send collateral projections to  
299 the mPFC, however, functional disconnection of CA1v-mPFC signaling did not impair spatial  
300 memory for food location. Utilization of an anterograde multisynaptic viral tracing approach and  
301 quantitative forebrain-wide axon mapping analyses revealed that the CA1v-LS pathway sends  
302 second-order projections to various feeding and reward-relevant neural substrates such as the  
303 LHA, ACB, and mPFC. Collectively, these data establish monosynaptic CA1v to LS signaling as  
304 essential for spatial memory-based foraging behavior, and we further identify a neural network  
305 of interconnected feeding-relevant substrates that are collateral and/or downstream targets of this  
306 pathway.

307 Historically, the hippocampus has been divided into the dorsal and ventral subregions  
308 that have both distinct and overlapping functions, anatomical connections, and genetic and  
309 receptor expression profiles (14, 15, 19, 33, 46). The HPCd has been predominantly implicated

310 in facilitating spatial memory, whereas the HPCv is linked with stress responses, affective  
311 behavior, and energy balance. However, the HPCv also plays a role in spatial memory,  
312 particularly for goal-directed navigation. Consistent with present results, a recent study found  
313 that both the HPCd and HPCv were critical for food reward-directed spatial navigation in an  
314 obstacle-rich complex environment (47). Under certain testing conditions, spatial learning and  
315 memory in an aversive reinforcement-based water maze also requires both subregions of the  
316 HPC (48). Similarly, whole-brain analysis of blood flow in rats during retrieval of spatial  
317 memory in an aversive reinforcement-based Barnes maze task revealed increased activation in  
318 the CA1d and CA1-3v in trained animals compared with controls (49). These results indicate that  
319 spatial processing in the hippocampus is organized longitudinally, and that both HPCd and HPCv  
320 are important for goal-directed spatial navigation. Here we expand this literature by identifying a  
321 specific HPCv-originating pathway (CA1v->LS) that selectively mediates spatial memory for the  
322 location of appetitive (food or water) reinforcement.

323         While HPCv neurons project widely throughout the neuraxis, projections to the LS are  
324 particularly robust (36). The LS has been implicated in food anticipatory/seeking behavior,  
325 where metabolic activation of the lateral septum peaks immediately before feeding (during food  
326 anticipatory activity) in rabbit pups (50) and gamma-rhythmic input to the LHA from the LS  
327 evokes food approach behavior (51). In addition, the LS can bidirectionally modulate food intake  
328 via a number of feeding-relevant neuropeptides, including glucagon-like peptide-1, ghrelin, and  
329 urocortin (52-54). A recent finding demonstrated that DREADDs-mediated disconnection of a  
330 HPCv to LS pathway (from CA3v and DGv) increases food intake in mice, with  
331 opposite/hyperphagic effects observed following activation of this pathway (37). Similarly, here  
332 we demonstrate that DREADDs-mediated acute silencing of the CA1v to LS pathway increases  
333 food intake in rats. Together these findings support a role for HPCv-LS signaling in regulating  
334 feeding behavior. However, these results are based on analyses conducted in the home cage  
335 where animals have free and unlimited access to food and water. Here we extend these findings  
336 by examining the role of CA1v to LS signaling in foraging-relevant memory processes under  
337 conditions that are more relevant to normal mammalian behavior, where food and water are not  
338 freely available. Not only do our results identify a novel role for CA1v to LS signaling in  
339 processing spatial memory for food and water reward location, but we further show that this

340 circuit appears to selectively promote spatial memory based on appetitive and not aversive-based  
341 reinforcement.

342 The use of two different but complementary approaches for neural pathway-specific  
343 disconnection allowed us to test at the levels of learning and memory separately. For example,  
344 the use of a reversible (DREADDs) disconnection procedure allowed us to evaluate the effect of  
345 CA1v to LS disconnection during the memory probe only, with circuit intact during training  
346 (CNO was not administered at any point during training). In contrast, the chronic (caspase)  
347 disconnection procedure was performed before training and therefore could have affected  
348 learning if CA1v to LS pathways were required for the learning of the task. However, our results  
349 showed that CA1v to LS did not impair learning, but rather, only memory retention performance  
350 in the probe test conducted days after the end of training. Thus, we can now confirm based on  
351 two complementary levels of analysis that this pathway is involved in longer-term memory recall  
352 but not learning/acquisition, which is consistent with recent evidence demonstrating that  
353 complete HPCv lesions impair retrieval (probe performance), but not acquisition (learning) in a  
354 Morris water maze (55).

355 Present results identify the CA1v-LS pathway in coordinating reward-motivated behavior  
356 with learned spatial information. While the use of aversive reinforcement-based spatial memory  
357 tasks are predominant, the radial arm maze has also been used to investigate food-motivated  
358 spatial memory (56). Specifically, the radial arm maze examines different components of spatial  
359 memory relevant to different foraging strategies. In win-shift tasks, animals learn to avoid  
360 previously visited reward arms, which models spontaneous alternation and exploration in  
361 environments with minimal resources. On the other hand, in win-stay tasks, animals learn to  
362 return to previously reinforced arms modeling foraging in environments of plentiful resources.  
363 An advantage of the present food-reinforced Barnes maze approach over the radial arm maze  
364 procedure is that we've developed parallel procedures that use the same apparatus and  
365 visuospatial cues to examine water- and escape-motivated spatial memory, thus offering a  
366 powerful approach to assess the selectivity of the circuit based on multiple reinforcement  
367 modalities (food vs. water vs. escape/aversive). While our results clearly support a role for the  
368 HPCv in food-reinforced spatial memory, a previous study utilizing a four-baited/four-unbaited  
369 version of the eight-arm radial maze task found that NMDA-mediated lesions of the HPCd, but  
370 not HPCv, impair spatial reference and working memory (57). Another study using a similar

371 procedure reported that complete HPC lesions impaired both spatial and working memory,  
372 whereas lesions to either the HPCd, HPCv, or intermediate HPC had minimal effect on memory  
373 performance (58). Future studies will needed to address whether discrepancies between the  
374 present results and these studies are based on the differences between the behavioral tasks and/or  
375 differences in loss of function methodologies. With regards to the latter, we note that our  
376 pathway-specific chemogenetic and caspase-lesion approaches offered far greater specificity  
377 (LS-projecting CA1v neurons vs. whole HPCv) compared with these studies.

378 Utilizing dual viral approaches and systematic forebrain-wide quantitative mapping  
379 analyses, our findings confirm that the CA1v-LS pathway projects downstream to other neural  
380 substrates involved in feeding and motivated behavior, including the LHA, ACB, and mPFC.  
381 This experiment was performed to generate novel neural connectivity data for the field and to  
382 demonstrate possible downstream 2<sup>nd</sup>-order targets that may inspire future research on these  
383 newly-identified multi-order neural circuits. Given that metabolic activity in the LS and ACB is  
384 associated with food anticipatory activity in rabbit pups (50), it is possible that the ACB is a  
385 functional downstream target of CA1v-LS signaling for coordinating foraging behavior. It is less  
386 likely, however, that the mPFC or the LHA are functional targets of CA1v-LS signaling for  
387 appetitive spatial memory control based on the lack of effects on spatial memory for food  
388 location when these pathways were disconnected. It is possible, however, that CA1v → LS →  
389 mPFC (or → LHA) signaling is relevant to other mnemonic process, such as those involved in  
390 drug-motivated or social-based memory tasks.

391 Collective results identify a CA1v to LS pathway involved in food- and water-motivated  
392 spatial memory, but not escape-motivated spatial memory. Furthermore, the selectivity of this  
393 pathway to appetitive spatial memory is supported by data showing that neither chronic nor  
394 reversible disruption of CA1v to LS signaling influenced various other behavioral outcomes,  
395 including anxiety-like behavior, locomotor activity, and nonspatial HPC-dependent appetitive  
396 memory. We also systematically characterized collateral and second-order projections of this  
397 pathway. Present results demonstrate overlapping pathways coordinated in the higher-order  
398 control of energy balance, of which foraging behavior is an essential component, given that  
399 foraging requires energy expenditure to locate food for subsequent energy intake. These data  
400 shed light on the neural systems underlying complex learned and motivated behaviors that  
401 require functional connections between cognitive and feeding-relevant substrates.

402

## 403 **METHODS**

404

### 405 **Animals**

406 Adult male Sprague–Dawley rats (Envigo; 250-275g on arrival) were individually housed  
407 in hanging wire cages with *ad libitum* access (except where noted) to water and chow (LabDiet  
408 5001, LabDiet, St. Louis, MO) on a 12h:12h reverse light/dark cycle. All procedures were  
409 approved by the University of Southern California Institute of Animal Care and Use Committee.

410

### 411 **General intracranial injection procedures**

412 Rats were anesthetized via an intramuscular injection of an anesthesia cocktail (ketamine  
413 90mg/kg body weight [BW], xylazine, 2.8mg/kg BW and acepromazine and 0.72mg/kg BW)  
414 followed by a pre-operative, subcutaneous injection of analgesic (ketoprofen, 5mg/kg BW). Post-  
415 operative analgesic (subcutaneous injection of ketoprofen, 5mg/kg BW) was administered once  
416 per day for 3 days following surgery. The surgical site was shaved and prepped with iodine and  
417 ethanol swabs, and animals were placed in a stereotaxic apparatus for stereotaxic injections.  
418 NMDA or viruses were delivered using a microinfusion pump (Harvard Apparatus, Cambridge,  
419 MA, USA) connected to a 33-gauge microsyringe injector attached to a PE20 catheter and  
420 Hamilton syringe. Flow rate was calibrated and set to 83.3nl/sec. Injectors were left in place for  
421 2min post-injection to allow for complete delivery of the infusate. Specific viruses/drugs,  
422 coordinates, and injection volumes for procedures are detailed below. Following the completion  
423 of all injections, incision sites were closed using either surgical staples, or in the case of  
424 subsequent placement of an indwelling cannula, simple interrupted sutures. Upon recovery from  
425 anesthesia and return to dorsal recumbency, animals were returned to the home cage. All  
426 behavioral procedures occurred 21 days after injections to allow for complete transduction and  
427 expression of the viruses, or complete lesioning drugs. General intracranial injection procedures  
428 were followed for all injection procedures below.

429

### 430 **Chronic lesions of the HPCv**

431 Lesion animals received bilateral excitotoxic HPCv lesions via intracranial injections of  
432 N-methyl-d-aspartate (NMDA; 4ug in 200nL; 100uL per hemisphere) at the following

433 coordinates at three different sites along the rostrocaudal extent of the HPCv (59): [1] -4.8mm  
434 AP, +/-5.0mm ML, -7.5mm DV, [2] -5.5mm AP, +/-4.5mm ML, -7.0mm DV, and [3] -6.1mm  
435 AP, +/-4.8mm ML, -7.0mm DV with control animals receiving vehicle saline in the same  
436 location. The reference points for AP and ML coordinates were defined at bregma, and the  
437 reference point for the DV coordinate was defined at the skull surface at the target site.

438 Bilateral HPCv lesion brains were histologically evaluated for the correct placement of  
439 lesions in 1 out of 5 series of brain tissue sections. Neurons were visualized using  
440 immunohistochemistry for the neuron specific antigen NeuN (see Immunohistochemistry). The  
441 extent of NMDA lesions was determined postmortem by immunohistochemical detection of the  
442 neuronal marker NeuN. Rats showing pronounced (~65%) loss of NeuN labeling within the  
443 target region compared with the representative NeuN expression following sham injections in the  
444 control group (average HPCv count of NeuN+ cells in control group) were included in data  
445 analysis (34). Representative images in Fig. 1A.

446

#### 447 **Acute and chronic disconnection of the CA1v to LS neural pathway**

448 Cre-dependent dual viral strategies were used to generate the following groups: [1] acute  
449 chemogenetic disconnection of the CA1v to LS neural pathway (DREADDs; diagram of  
450 approach in Fig. 2A), [2] chronic disconnection of the CA1v to LS neural pathway (caspase  
451 lesion-induced; diagram of approach in Fig. 2B), and [3] a common/shared control group for  
452 these two disconnection strategies. Regardless of group, all animals received a bilateral AAV  
453 retro-cre injection in the LS (AAV2[retro]-hSYN1-EGFP-2A- iCre-WPRE; 200nL per side) at  
454 the following stereotaxic coordinates (59): +0.84mm AP, +/-0.5mm ML, -4.8mm DV, all  
455 defined at bregma.

456 According to experimental group, animals received a different virus delivered to the  
457 CA1v subregion of the HPCv. All viruses were administered to the CA1v at the following  
458 stereotaxic coordinates (59): -4.9mm AP defined at bregma, +/-4.8mm ML defined at bregma,  
459 -7.8mm DV defined at skull surface at target site.

460 *[1] DREADDs group for reversible inactivation of CA1v to LS:* To allow reversible  
461 chemogenetic inactivation of the CA1v to LS neural pathway, one group of animals received a  
462 bilateral CA1v injection of a cre-dependent virus to drive expression of inhibitory designer  
463 receptors activated by designer drugs (DREADDs), (AAV-Flex-hm4Di-tdTomato). This dual



464 viral strategy drives expression of inhibitory DREADDs exclusively in LS-projecting CA1v  
465 neurons, which enables acute inactivation of these neurons by injection of the DREADDs ligand,  
466 clozapine-N-oxide (CNO), at the time of behavioral testing.

467 *[2] Caspase group for chronic inactivation of CA1v to LS:* To allow chronic  
468 disconnection of the CA1v to LS neural pathway, a second group of animals received a bilateral  
469 CA1v cre-dependent caspase virus (AAV1-Flex-taCasp3-TEVp; 200nL per side) mixed with a  
470 cre-dependent reporter virus (AAV-flex-tdTomato; 200nL per side) for histological verification.  
471 This dual viral strategy drives expression of the apoptosis-mediator molecule caspase exclusively  
472 in LS-projecting CA1v neurons, which induces apoptotic cell death in these neurons while  
473 leaving other CA1v neurons intact.

474 *[3] Common control:* A common control group was generated so that the DREADDs and  
475 caspase groups could both be compared to the same control group, instead of two different  
476 control groups for the DREADDs and caspase groups, respectively. This allowed us to reduce  
477 the number of animals needed for the same experimental objective. Thus, all animals received an  
478 indwelling cannula and ICV injections of CNO as described below.

479 Immediately following viral injections, all animals were surgically implanted with a  
480 unilateral indwelling intracerebroventricular (ICV) cannula (26-gauge, Plastics One, Roanoke,  
481 VA) targeting the lateral ventricle (VL). Cannulae were implanted and affixed to the skull with  
482 jeweler's screws and dental cement at the following stereotaxic coordinates: -0.9mm AP defined  
483 at bregma, +1.8mm ML defined at bregma, -2.6mm DV defined at skull surface at site.  
484 Placement for the VL cannula was verified by elevation of blood glucose resulting from an  
485 injection of 210 $\mu$ g (2 $\mu$ L) of 5-thio-D-glucose (5TG) using an injector that extended 2mm beyond  
486 the end of the guide cannula (60). A post-injection elevation of at least 100% of baseline  
487 glycemia was required for subject inclusion. Animals that did not pass the 5TG test were retested  
488 with an injector that extended 2.5mm beyond the end of the guide cannula and, upon passing the  
489 5TG test, were subsequently injected using a 2.5mm injector instead of a 2mm injector for the  
490 remainder of the study. Prior to behavioral testing where noted, all animals received an ICV  
491 18mmol infusion (2 $\mu$ L total volume) of the DREADDs ligand clozapine N-oxide (CNO) (61),  
492 rendering only DREADDs animals chemogenetically inactivated. CNO injections were hand  
493 delivered using a 33-gauge microsyringe injector attached to a PE20 catheter and Hamilton

494 syringe through the indwelling guide cannulae. Injectors were left in place for 30sec to allow for  
495 complete delivery of the CNO.

496 Cre-dependent DREADD expression targeting LS-projecting neurons in CA1v was  
497 evaluated based on localization of the fluorescent reporter tdTomato. Immunohistochemistry for  
498 red fluorescent protein (RFP) was conducted to amplify the tdTomato signal (see  
499 Immunohistochemistry). Only animals with tdTomato expression restricted within CA1v neurons  
500 were included in subsequent behavioral analyses. Representative images in Figs. 2C&D.

501 The general approach for neuronal apoptosis due to activation of cre-dependent caspase  
502 targeting LS-projecting neurons in CA1v was validated in a separate cohort (n=8) based on  
503 reduction of a cre-dependent fluorescent reporter tdTomato due to neuron cell death compared  
504 with controls. The caspase group brains (which received a retro-cre virus in the LS in  
505 conjunction with an injection of cre-dependent caspase virus mixed with a cre-dependent virus  
506 that drives a tdTomato fluorescent reporter in the CA1v) were compared to control brains (that  
507 received a retro-cre virus in the LS in conjunction with only a cre-dependent that drives a  
508 tdTomato fluorescent reporter in the CA1v, which was equivalently diluted to match the caspase  
509 injections). In both groups, immunohistochemistry for red fluorescent protein (RFP) was  
510 conducted to amplify the tdTomato signal (see Immunohistochemistry). Confirmation of  
511 successful caspase-driven lesions in the CA1v using this approach was evaluated by reduced  
512 tdTomato fluorescence in comparison to control animals, with the expression of CA1v tdTomato  
513 expression in the caspase group less than 15% of that observed in controls, on average  
514 (Representative images in Supplementary Figs 2E&F). While this cohort allowed for successful  
515 validation of the pathway-specific disconnection caspase approach, to improve the viability of  
516 the animals for long-term behavioral analyses, the 3<sup>rd</sup> AAV with the fluorescent reporter (cre-  
517 dependent tdTomato AAV) was omitted for cohorts undergoing behavioral analyses. For these  
518 groups, histological confirmation for inclusion in subsequent statistical analyses was based on  
519 identification of injections sites confined with the LS and CA1v, as observed using darkfield  
520 microscopy.

521

522

523 **Identification of collateral targets of CA1v to LS projecting neurons**



524 Collateral targets of the CA1v to LS neural pathway were identified using a dual viral  
525 approach (diagram of approach in Fig. 4A) where a retrograde vector was injected into the LS  
526 (AAV2retro-hSyn1-eGFP-2A-iCre-WPRE; 200nL per side; coordinates as above), and a Cre-  
527 dependent anterograde vector (AAV1-CAG-Flex-tdTomato-WPRE-bGH; 200nL per side;  
528 coordinates as above) was injected in the CA1v. This latter injection drives tdTomato transgene  
529 expression in CA1v neurons that project to the LS, which allows for brain-wide analyses of  
530 collateral targets. After 3 weeks of incubation time to allow for complete transduction and  
531 expression of the viruses, brains were collected, immunohistochemically processed, and imaged  
532 as described below.

533

### 534 **Contralesional disconnection of the CA1v to mPFC neural pathway or the CA1v to LHA** 535 **neural pathway**

536 To functionally disconnect the CA1v to mPFC pathway (diagram of approach in Fig. 4E),  
537 or the CA1v to LHA pathway (diagram of approach in Fig. 4J) lesion animals received a  
538 unilateral excitotoxic CA1v lesion via an intracranial injection of NMDA (200nL) at the  
539 following coordinates (36): -4.9mm AP defined at bregma, + or - 4.8mm ML defined at bregma  
540 (left/right counterbalanced to be contralateral to mPFC or LHA lesion within-animal), -7.8mm  
541 DV defined at skull surface at site, with control animals receiving vehicle saline injections in the  
542 same location.

543 In addition to the CA1v lesion, CA1v to mPFC disconnect animals also received a  
544 unilateral excitotoxic mPFC lesion via two intracranial injections of NMDA (4ug in 200nL;  
545 100nL per injection) at the following coordinates (59): [1] +2.7mm AP, + or - 0.7mm ML  
546 (left/right counterbalanced to be contralateral to CA1v lesion within-animal), -5.3mm DV and  
547 [2] +3.0mm AP, + or - 0.7mm ML (left/right counterbalanced to be contralateral to CA1v lesion  
548 within-animal), -4.7mm DV, with control animals receiving vehicle saline in the same location.  
549 The reference points for all mPFC coordinates were defined at bregma.

550 In addition to the CA1v lesion, CA1v to LHA disconnect animals also received a  
551 unilateral excitotoxic LHA lesion via an intracranial injection of NMDA (100nL per injection) at  
552 the following coordinates (59): +2.9mm AP, + or - 1.1mm ML (counterbalanced to be  
553 contralateral to CA1v lesion within-animal), -8.9mm DV, with control animals receiving vehicle

554 saline in the same location. The reference points for all LHA coordinates were defined at  
555 bregma.

556 Contralesional brains were histologically evaluated for the correct placement of lesions by  
557 visualizing neurons using immunohistochemistry for the neuron specific antigen NeuN (see  
558 Immunohistochemistry). The extent of NMDA lesions was determined postmortem by  
559 immunohistochemical detection of the neuronal marker NeuN. Rats showing pronounced (65%)  
560 loss of NeuN labeling within the target region compared with a sham injection in the  
561 contralateral side were included in data analysis (34).

562

### 563 **Identification of second order targets of CA1v to LS projecting neurons**

564 To identify second order targets of CA1v to LS-projecting neurons (diagram of approach  
565 in Fig. 5A), animals received a bilateral injection of a transsynaptic Cre-inducing anterograde  
566 vector into CA1v (AAV1-hSyn-Cre-WPRE-hGH; 200nL per side; coordinates as above) that  
567 drives expression of Cre in both first-order (CA1v injection site) and 2<sup>nd</sup>-order (but not 3<sup>rd</sup>-  
568 order) neurons via transsynaptic virion release (62, 63). This was combined with a bilateral  
569 injection of a Cre-dependent anterograde vector in the LS (AAV1-CAG-Flex-tdTomato-WPRE-  
570 bGH; 200nL per side, coordinates as above). This latter injection allows for anterograde tracing  
571 from 1<sup>st</sup>-order LS targets receiving synaptic input from CA1v. After 3 weeks of incubation time  
572 to allow for complete transduction and expression of the viruses, brains were collected,  
573 immunohistochemically processed, and imaged as described below.

574 Data were entered using a custom built data-entry platform (Axiome C, created by JDH)  
575 built around Microsoft Excel software and designed to facilitate entry of data points for all gray  
576 matter regions across their atlas levels as described in a rat brain reference atlas: Brain Maps 4.0  
577 (59). The Axiome C approach was used previously to facilitate the analysis of brain gene-  
578 expression data (64). An ordinal scale, ranging from 0 (absent) to 7 (very strong), was used to  
579 record the qualitative weight of anterograde labeling. An average value was then obtained for  
580 each region across its atlas levels for which data were available. These data are summarized  
581 graphically for a representative animal on a brain flatmap summary diagram (adapted from (65)).

582

### 583 **Food intake and body weight**

584 For the day prior to surgery (day 0) and for two weeks thereafter, 24h chow intake was  
585 measured daily just prior to dark cycle onset to determine effects of experimental procedures on  
586 food intake. Spillage was accounted for daily by collecting crumbs onto Techboard paper placed  
587 under the cages of each animal. Additionally, animals were weighed daily just prior to dark cycle  
588 onset to determine effects of experimental procedures on body weight.

589

### 590 **Meal pattern**

591 Meal size, meal frequency, meal duration, and cumulative 24h food intake were  
592 measured using Biodaq automated food intake monitors (Research Diets, New Brunswick, NJ).  
593 Rats (control n=7, caspase n=8, and DREADDs n=8) were acclimated to the Biodaq on ad  
594 libitum chow for 3 days. Caspase group vs. control group feeding behavior data were collected  
595 over a 5-day period (untreated, between-subjects design). The DREADDs group was tested using  
596 a 2-treatment within-subjects design. Rats received 18mmol infusion of ICV CNO (2uL total  
597 volume) or vehicle (daCSF, 33% dimethyl sulfoxide in artificial cerebrospinal fluid) 1h prior to  
598 lights off and 24h feeding behavior was measured. Meal parameters were set at minimum meal  
599 size=0.2g and maximum intermeal interval=600s.

600

### 601 **Appetitive food seeking spatial memory task**

602 To test visuospatial learning and memory for food reinforcement, we developed a novel  
603 spatial food seeking task modified from the traditional Barnes maze procedure (6). Throughout  
604 this paradigm, animals were maintained at 85% free-feeding body weight. The procedure  
605 involves an elevated gray circular platform (diameter: 122cm, height: 140cm) consisting of 18  
606 uniform holes (9.5cm diameter) spaced every twenty degrees around the outside edge. Under one  
607 of the holes is a hidden tunnel (38.73cm L x 11.43cm W x 7.62cm D and a 5.08cm step).  
608 Surrounding the table are distinct spatial cues on the wall (e.g. holiday lights, colorful shapes,  
609 stuffed unicorn) that are readily visible to the animal. In contrast to the traditional Barnes Maze  
610 where an animal uses the spatial cues to escape mildly aversive stimuli in the environment (e.g.  
611 bright light and loud sound), this task utilizes food as motivation, such that each hidden tunnel  
612 contained five 45mg sucrose pellets (Bio-Serv, Flemington, NJ). Additionally, a quiet white  
613 noise (60dB) was used to drown out background noise and floor lamps were used for low-level  
614 ambient lighting. On the first day, each animal underwent a habituation session consisting of

615 1min inside a transport bin under the table, 2min underneath the start box in the center of the  
616 table, and 3min inside the hidden tunnel with 5 sucrose pellets. During training, each rat was  
617 assigned a specific escape hole according to the position of the spatial cues with the location  
618 counterbalanced across groups. Before each trial, animals were placed in the start box for 30  
619 seconds. Animals were trained over the course of two 5-min trials per day for four days (five  
620 days in contralesional experiments) to learn to use the spatial cues in order to locate the correct  
621 hole with the hidden tunnel with sucrose pellets. After finding the correct hole and entering the  
622 hidden tunnel during each 5min training session, animals were allowed to remain in the hidden  
623 tunnel for 1 minute, and consistently consumed all 5 sucrose pellets at this time. In the event that  
624 a rat did not find the correct hole during the 5min training session, the experimenter gently  
625 guided the rat to the correct hole and were allowed to crawl in and then complete the training in  
626 the same fashion as rats that found the hole on their own. Learning during training was scored  
627 via animal head location tracking by AnyMaze Behavior Tracking Software (Stoelting Co.,  
628 Wood Dale, IL). The incorrect hole investigations prior to finding the correct hole with sucrose  
629 pellets (“errors before correct hole”) as well as time to finding the correct hole (“latency to  
630 correct hole”) were calculated as an average of the two trials per day, and examined across days  
631 of training.

632 After the conclusion of training, rats had a two-day break where no procedures occurred,  
633 then were tested in a single 2min memory probe in which the hidden tunnel and sucrose pellets  
634 were been removed. All animals received an ICV 18mmol infusion of CNO (2uL total volume)  
635 1h prior to the memory probe, rendering only DREADDs animals chemogenetically inactivated  
636 by CNO. In the memory probe, the ratio of the correct hole plus adjacent hole investigations over  
637 the total number of hole investigations were calculated via animal head location tracking by  
638 AnyMaze Behavior Tracking Software (Stoelting, Wood Dale, IL). This dependent variable was  
639 selected a priori instead of correct hole only investigations based on recent findings  
640 demonstrating that taste-responsive hippocampal neurons exhibit weaker spatial selectivity in  
641 comparison to non-taste-responsive hippocampal neurons (66). When establishing and refining  
642 the food-reinforced spatial memory procedure in multiple cohorts of rats, our preliminary data  
643 revealed that memory probe effects in normal/control animals are either stronger in the 1<sup>st</sup>  
644 minute, or in the 1<sup>st</sup> two minutes combined (but not the 2<sup>nd</sup> minute alone), with some cohorts  
645 showing larger paradigm effects in minute 1, and others in minutes 1+2. Thus, for all

646 experiments presented we analyzed both the 1<sup>st</sup> minute and the 1<sup>st</sup> two minutes combined based  
647 on an a priori determination from our preliminary studies. A diagram of the apparatus used for  
648 the spatial foraging task is included in Fig. 1B.

649         During training sucrose pellets were taped underneath all of the holes to preclude  
650 olfactory-based search strategies during training. Importantly, the memory probe test does not  
651 include any sucrose pellets in the apparatus at all, and therefore there is no possibility of sucrose  
652 odor cues to influence memory probe performance.

653

#### 654 **Appetitive water seeking spatial memory task**

655         We modified our spatial food seeking task to utilize water reward instead of food reward.  
656 Throughout this paradigm, animals were water restricted and received 90-min access to water  
657 daily (given at least 1hr after the termination of behavioral procedures each day). In addition to  
658 the habituation parameters described above, animals in this task were subjected to two 10-min  
659 habituation sessions in the hidden tunnel with a full water dish prior to training, which allowed  
660 them to become accustomed to reliably drinking from the water dish in the hidden tunnel.  
661 Training procedures were the same as for the food-based task above, except instead of sucrose  
662 pellets in the hidden tunnel, a water dish containing ~100 mL of water was placed in the back of  
663 the hidden tunnel during training, and animals were allowed to remain in the hidden tunnel for  
664 2min (instead of 1min, as above). Each animal consumed a minimum of 2mL of water during  
665 this time for the training sessions. This newly-developed procedure allowed us to test spatial  
666 learning and memory motivated by water reward using similar apparatus and stimulus conditions  
667 to the food-reinforced task.

668

#### 669 **Aversive spatial memory escape task (Barnes maze)**

670         To test visuospatial learning and memory for escape reinforcement, we used a modified  
671 traditional Barnes maze procedure, which is a visuospatial-based escape task (6). Procedures  
672 were exactly the same as above (appetitive spatial memory food seeking and water seeking tasks,  
673 using the same apparatus, in the same room, and with the same visuospatial cues) aside from the  
674 omission of the sucrose pellets or water dish in the hidden tunnel, the presence of mildly aversive  
675 bright (120W) overhead lighting instead of dim ambient lighting, and a mildly aversive loud  
676 white noise (75dB) instead of a quiet white noise (60dB). This allowed us to test spatial learning

677 and memory motivated by escape from aversive stimuli in a nearly-identical procedure to our  
678 spatial foraging test for learning and memory motivated by palatable food or water consumption.  
679 A diagram of the apparatus used for the spatial escape task is included in Fig. 1B.

680

### 681 **Social transmission of food preference (STFP)**

682 To examine food-related memory based on social- and olfactory-based cues, we utilized  
683 the social transmission of food preference (STFP) task and adapted protocols from (32, 42, 67,  
684 68). Briefly, untreated normal adult rats are designated as ‘Demonstrators’, while experimental  
685 groups are designated as ‘Observers’. Demonstrators and Observers are habituated to a powdered  
686 rodent chow [LabDiet 5001 (ground pellets), LabDiet, St. Louis, MO] overnight. 24h later,  
687 Observers are individually paired with demonstrators and habituated to social interaction, where  
688 rat pairs are placed in a social interaction arena (23.5cm W × 44.45cm L × 27cm H clear plastic  
689 bin with Sani-chip bedding) and allowed to interact for 30min. Both Observers and  
690 Demonstrators are returned to their home cages and food is withheld for 23hr prior to the social  
691 interaction. For the social interaction, Demonstrators are given the opportunity to consume one  
692 of two flavors of powdered chow (flavored with 2% marjoram or 0.5% thyme; counterbalanced  
693 according to group assignments) for 30min in a room separate from Observers. Our pilot studies  
694 and previous published work (68, 69) show that rats equally prefer these flavors of chow. The  
695 Demonstrator rat is then placed in the social interaction arena with the Observer rat, and the pairs  
696 are allowed to socially interact for 30min. Observers are then returned to their home cage and  
697 allowed to eat *ad libitum* for 1h and then food is removed. The following day, the 23h food-  
698 deprived Observer animals are given a home cage food preference test for either the flavor of  
699 chow paired with the Demonstrator animal, or a novel, unpaired flavor of chow that is a flavor  
700 that was not given to the Demonstrator animal (2% marjoram vs. 0.5% thyme; counterbalanced  
701 according to group assignments). All animals received an ICV 18mmol infusion of CNO (2uL  
702 total volume) 1h prior to the social interaction session, rendering only DREADDs animals  
703 chemogenetically inactivated by CNO. Food intake (1h) was recorded with spillage accounted  
704 for by collecting crumbs onto Techboard paper that is placed under the cages of each animal.  
705 The % preference for the paired flavor is calculated as:  $100 \times \frac{\text{Demonstrator-paired flavored chow intake}}{\text{Demonstrator + Novel flavored chow intake}}$ . In this procedure, normal untreated animals



707 learn to prefer the Demonstrator paired flavor based on social interaction and smelling the breath  
708 of the Demonstrator rat (32, 42, 67-69). A diagram of the STFP procedure is included in Fig. 3E.

709

### 710 **Zero maze**

711 The zero maze behavioral paradigm was used to evaluate anxiety-like behavior. The zero  
712 maze apparatus used was an elevated circular track, divided into four equal length sections. Two  
713 zones were open with 3 cm high curbs ('open zones'), whereas the two other zones were closed  
714 with 17.5 cm high walls ('closed zones'). All animals received an ICV 18mmol infusion of CNO  
715 (2uL total volume) 1h prior to testing, rendering only DREADDs animals chemogenetically  
716 inactivated by CNO. Behavioral testing was performed during the light cycle. Animals were  
717 placed in the maze for a single, 5min trial in which the location of the center of the animal's  
718 body was measured by AnyMaze Behavior Tracking Software (Stoelting, Wood Dale, IL). The  
719 apparatus was cleaned with 10% ethanol in between animals. During the trial, the number of  
720 open zone entries and total time spent in open sections (defined as body center in open sections)  
721 were measured, which are each indicators of anxiety-like behavior in this procedure. A diagram  
722 of the zero maze apparatus is included in Fig. 3G.

723

### 724 **Open field**

725 An open field test was used to evaluate general levels of locomotor activity. The  
726 apparatus used for the open field test was an opaque gray plastic bin (60cm × 56cm), which was  
727 positioned on a flat table in an isolated room with a camera directly above the center of the  
728 apparatus. Desk lamps were positioned to provide indirect lighting to all corners of the maze  
729 such that the lighting in the box uniformly measured 30 lux throughout. All animals received an  
730 ICV 18mmol infusion of CNO (2uL total volume) 1h prior to testing rendering only DREADDs  
731 animals chemogenetically inactivated by CNO. Behavioral testing began at dark onset. At the  
732 start of the 10min test, each animal was placed in the open field apparatus in the same corner  
733 facing the center of the maze. The location of the center of the animal's body was measured with  
734 the AnyMaze Behavior Tracking Software (Stoelting, Wood Dale, IL). Total distance traveled  
735 was measured by tracking movement from the center of the animal's body throughout the test.

736

### 737 **Immunohistochemistry**

738 Rats were anesthetized via an intramuscular injection of an anesthesia cocktail (ketamine  
739 90mg/kg BW xylazine, 2.8mg/kg BW and acepromazine and 0.72mg/kg BW) then transcardially  
740 perfused with 0.9% sterile saline (pH 7.4) followed by 4% paraformaldehyde (PFA) in 0.1M  
741 borate buffer (pH 9.5; PFA). Brains were dissected from the skull and post-fixed in PFA with  
742 15% sucrose for 24h, then flash frozen in isopentane cooled in dry ice. Brains were sectioned to  
743 30 $\mu$ m thickness on a freezing microtome. Sections were collected in 5-series and stored in  
744 antifreeze solution at  $-20^{\circ}\text{C}$  until further processing. General fluorescence IHC labeling  
745 procedures were performed as follows. The antibodies and dilutions that were used are as  
746 follows: [1] For lesion histology using the neuron-specific protein NeuN, the rabbit anti-NeuN  
747 primary antibody (1:1000, Abcam) was used followed by a donkey anti-rabbit conjugated to  
748 AF488 (1:500, Jackson ImmunoResearch). [2] To amplify the native tdTomato signal for  
749 neuroanatomical tracing or DREADDs histology, the rabbit anti-RFP primary antibody (1:2000,  
750 Rockland) was used followed by a donkey anti-rabbit conjugated to Cy3 (1:500, Jackson  
751 ImmunoResearch). [3] To amplify the native GFP signal for LS injection site histology, the  
752 chicken anti-GFP primary antibody (1:500, Abcam) was used followed by a donkey anti-chicken  
753 secondary antibody conjugated to AF488 (1:500, Jackson ImmunoResearch). Antibodies were  
754 prepared in 0.02M potassium phosphate buffered saline (KPBS) solution containing 0.2% bovine  
755 serum albumin and 0.3% Triton X-100 at  $4^{\circ}\text{C}$  overnight. After thorough washing with 0.02M  
756 KPBS, sections were incubated in secondary antibody solution. All secondary antibodies were  
757 obtained from Jackson ImmunoResearch and used at 1:500 dilution at  $4^{\circ}\text{C}$ , with overnight  
758 incubations (Jackson ImmunoResearch; West Grove, PA, USA). Sections were mounted and  
759 coverslipped using 50% glycerol in 0.02 M KPBS and the edges were sealed with clear nail  
760 polish. Photomicrographs were acquired using a Nikon 80i (Nikon DSQI1,1280X1024  
761 resolution, 1.45 megapixel) under epifluorescence or darkfield illumination.  
762 Lesions and virus expression were quantified in one out of five series of brain tissue sections and  
763 analyses were performed in sections from Swanson Brain Atlas level 34-36 (59). The inclusion /  
764 exclusion criteria are described above in the methods of each of these experiments.

765

## 766 **Statistics**

767 Data are expressed as mean  $\pm$  SEM. Differences were considered to be statistically  
768 significant at  $p < 0.05$ . All variables were analyzed using the advanced analytics software package



769 Statistica (StatSoft, Tulsa, OK, USA). For all measures of food intake, body weight, and  
770 errors/latency during spatial foraging and spatial escape task training, differences between  
771 groups were evaluated using two-way repeated measures ANOVAs (treatment x time). For  
772 lesion experiments, measures during spatial foraging and spatial escape task probes, differences  
773 between groups were evaluated using two-tailed independent two-sample Student's t-tests. For  
774 CA1v to LS disconnection experiments, measures during spatial foraging and spatial escape task  
775 probes, the STFP paradigm, the zero maze paradigm, and the open field test, differences between  
776 groups were evaluated using one-way ANOVAs. Significant ANOVAs were analyzed with a  
777 Fisher's LSD posthoc test where appropriate. Outliers were identified as being more extreme  
778 than the median +/- 1.5 \* interquartile range. For all experiments, assumptions of normality,  
779 homogeneity of variance (HOV), and independence were met where required.

780

781

## 782 **CONFLICT OF INTEREST**

783 No conflicts of interest.

784

## 785 **ACKNOWLEDGEMENTS**

786 This work was supported by National Institute of Diabetes and Digestive and Kidney Diseases  
787 grants: DK104897 to SEK, DK118944 to CML, and DK116558 to ANS. Clozapine-N-Oxide  
788 was kindly provided by the National Institute of Mental Health. The authors are grateful to the  
789 Kanoski lab undergraduates for their assistance in behavioral experiments and histology.

790

791

# Figure 1

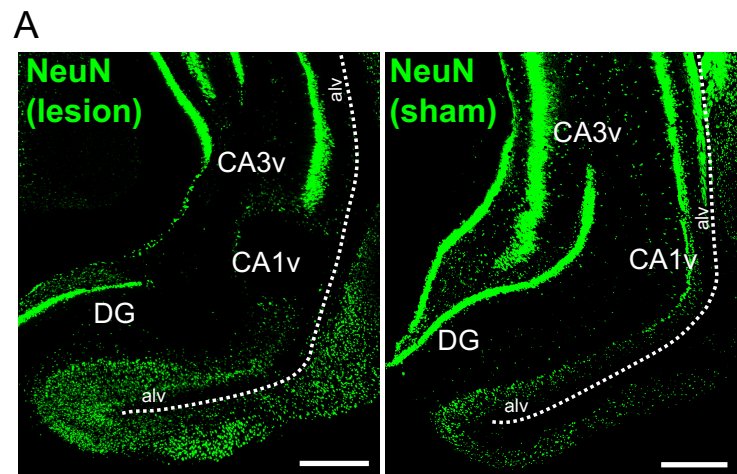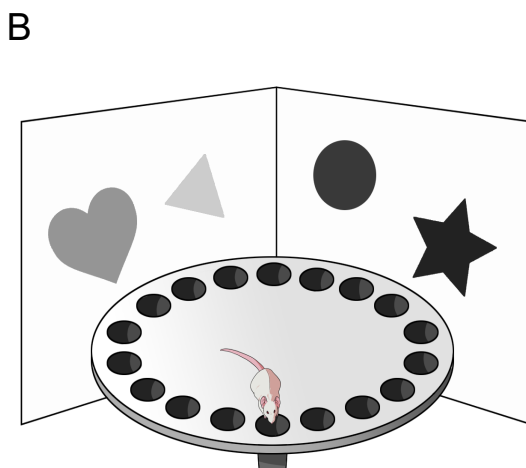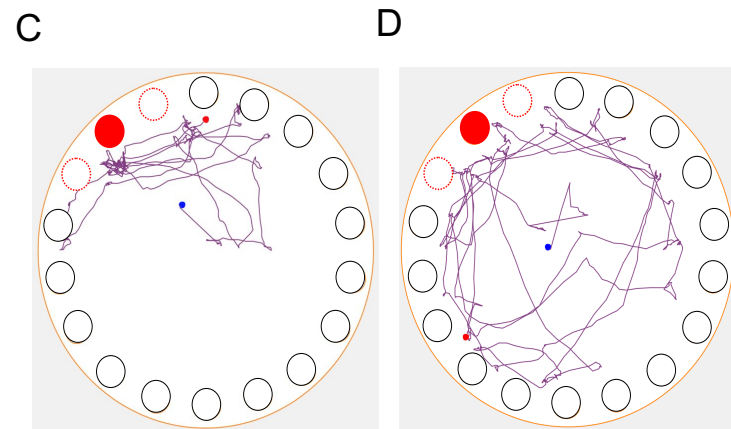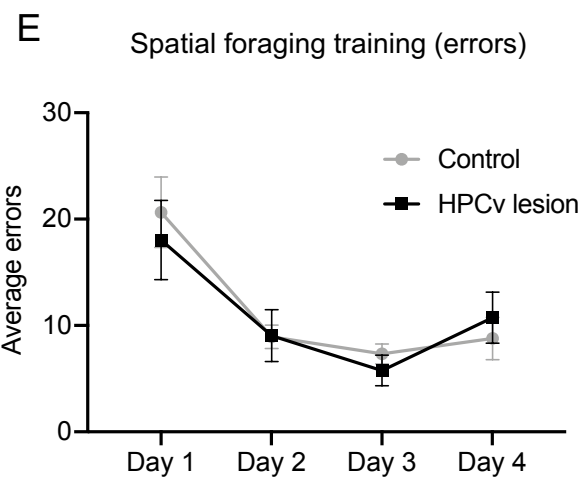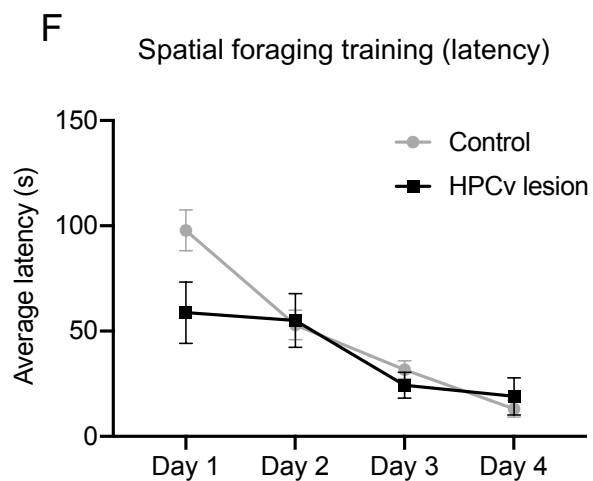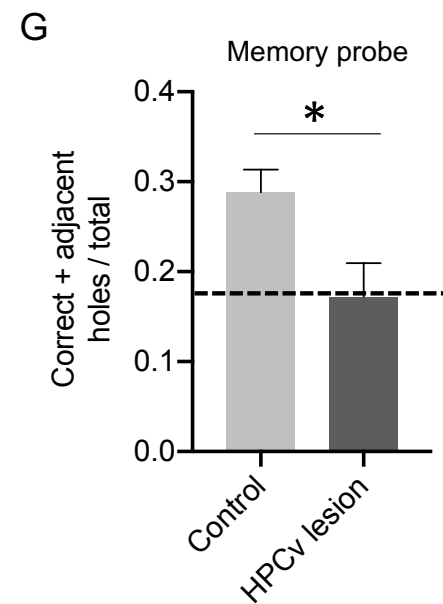

792 **Figure 1. Bilateral HPCv lesions impair spatial memory for food location.** Representative  
793 HPCv lesion histology with NeuN immunohistochemistry (A; scale bars 500 $\mu$ m). Spatial  
794 foraging task apparatus (B). Representative navigation paths of a control animal preferentially  
795 investigating correct (filled red) and adjacent holes (outlined orange) during spatial foraging  
796 memory probe (C). Representative navigation path of HPCv lesioned animal during spatial  
797 foraging memory probe (D). Bilateral HPCv lesions did not impair learning of the spatial  
798 foraging task compared to controls, as measured by errors before locating correct hole during  
799 task training (E) and latency to locate correct hole during task training (F). Bilateral HPCv  
800 lesions impaired retention of the spatial foraging task, as measured by the ratio of investigation  
801 of correct plus adjacent holes over total investigated during the first minute of the task ( $p < 0.05$ ;  
802 G). There were no group differences observed when evaluated over the entire two minutes of the  
803 task (H). Dotted line indicates chance performance level (0.167). For graphs 1D-G, lesion  $n = 11$ ,  
804 control  $n = 18$ . All values expressed as mean  $\pm$  SEM.

805

806

# Figure 2

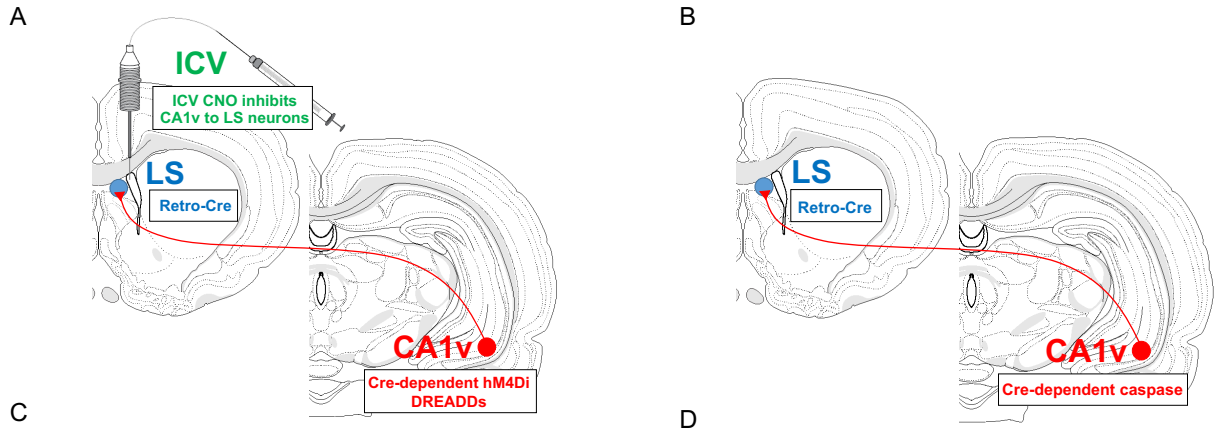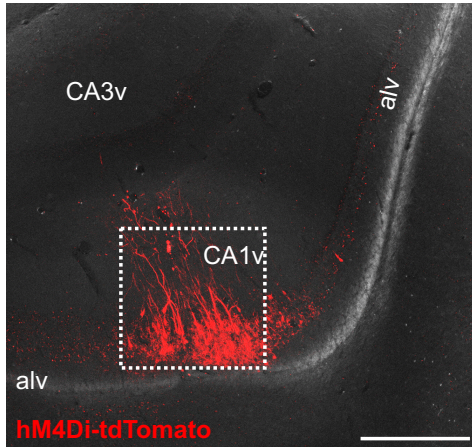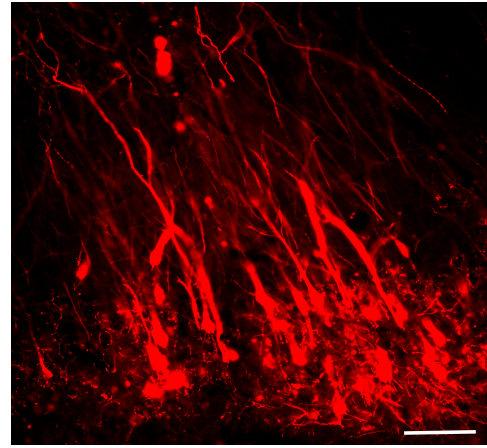

**E** Spatial food seeking training (errors)

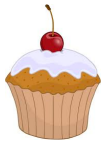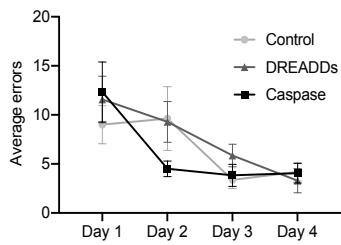

**F** Spatial food seeking training (latency)

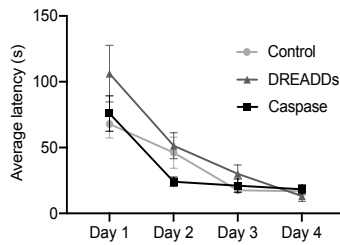

**G** Memory probe

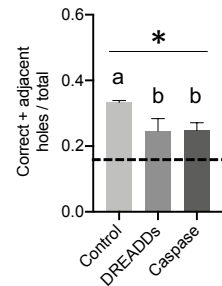

**H** Spatial water seeking training (errors)

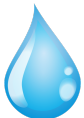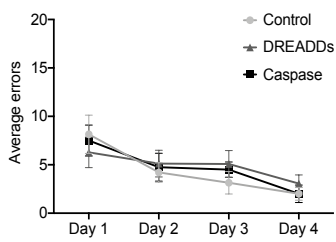

**I** Spatial water seeking training (latency)

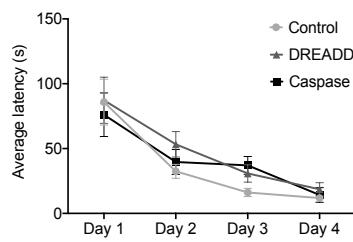

**J** Memory probe

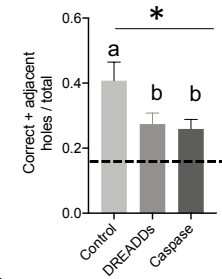

**K** Spatial escape training (errors)

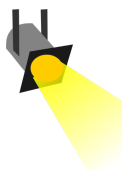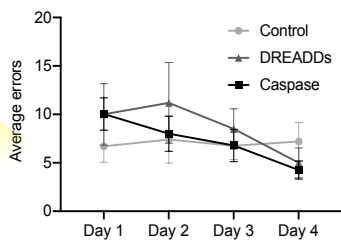

**L** Spatial escape training (latency)

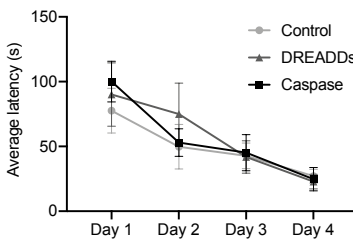

**M** Memory probe

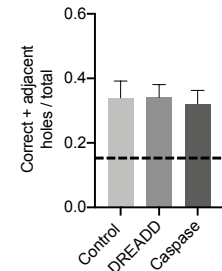

807 **Figure 2. Reversible and chronic CA1v to LS neural disconnection impairs spatial memory**  
808 **for food and water location but not for escape location.** Diagram of dual viral approach using  
809 a cre-dependent inhibitory DREADDs approach to reversibly disconnect CA1v to LS neural  
810 pathway (A). Diagram of dual viral approach using a cre-dependent caspase approach to  
811 chronically disconnect CA1v to LS neural pathway (B). Representative injection site in CA1v  
812 demonstrating LS-projecting neurons infected with inhibitory DREADDs, which simultaneously  
813 drives expression of a fluorescent tdTomato transgene (C, D; scale bars 500µm and 100µm,  
814 respectively). Neither reversible (DREADDs) nor chronic (caspase) disconnection of the CA1v  
815 to LS pathway impaired learning of the spatial food seeking task compared to controls, as  
816 measured by errors before correct hole during task training (E) and latency to correct hole during  
817 task training (F). Both reversible and chronic disconnection of the CA1v to LS pathway impaired  
818 retention of the food location as measured by the ratio of investigation of correct plus adjacent  
819 holes over total investigations during entire two minutes of the task ( $p < 0.05$ ; G). Likewise,  
820 reversible (DREADDs) and chronic (caspase) disconnection of the CA1v to LS pathway did not  
821 impair learning of the spatial water seeking task compared to controls, as measured by errors  
822 before correct hole during task training (H) and latency to correct hole during task training (I),  
823 but impaired memory retention of the water location during the probe (J). In contrast,  
824 disconnection of the CA1v to LS pathway either reversibly (DREADDs) or chronically (caspase)  
825 did not impair performance on the spatial escape task. There were no differences in learning as  
826 measured by errors before correct hole during task training (K) and latency to correct hole during  
827 task training (L). Unlike the spatial foraging task, retention of the spatial escape task was not  
828 impaired by reversible nor chronic disconnection of the CA1v to LS pathway (M). For graphs  
829 2E-G (CA1v to LS disconnect cohort 1), DREADDs  $n=6$ , caspase  $n=10$ , control  $n=8$ . For graphs  
830 2H-J (CA1v to LS disconnect cohort 3), DREADDs  $n=8$ , caspase  $n=8$ , control  $n=7$ ). For graphs  
831 2K-M (CA1v to LS disconnect cohort 2), DREADDs  $n=8$ , caspase  $n=12$ , control  $n=10$ . Dotted  
832 line indicates chance performance level (0.167). All values expressed as mean  $\pm$  SEM.  
833  
834

# Figure 3

A

Day 1

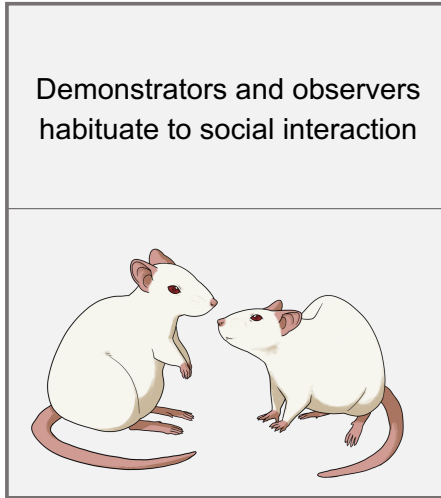

Day 2

Demonstrators consume flavored chow (chow A) prior to social interaction

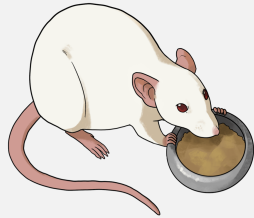

Demonstrators and observers have a 30min social interaction

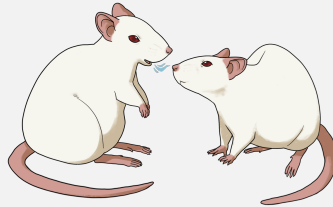

Day 3

Food-restricted observers are given a 60min flavor preference test (chow A vs. novel chow B)

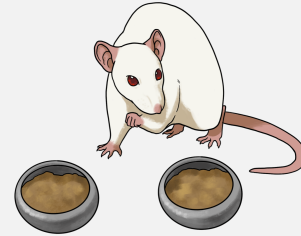

B

Social transmission of food preference

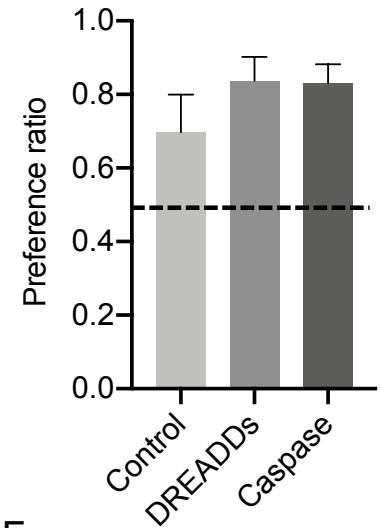

C

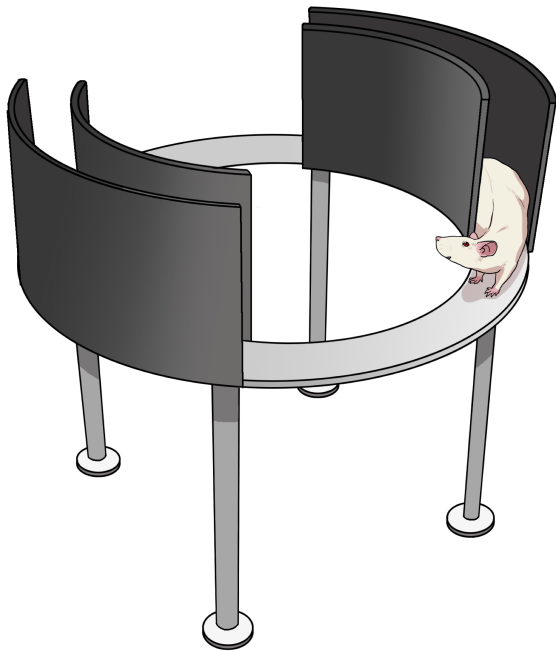

D

Zero maze:  
Open zone time

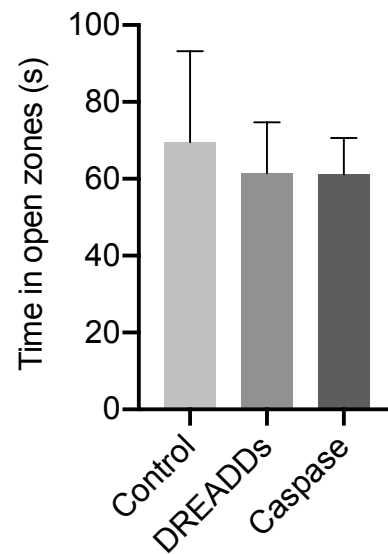

E

Zero maze:  
Open zone entries

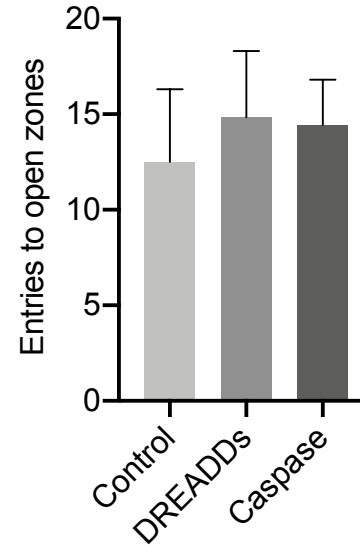

F

Open field

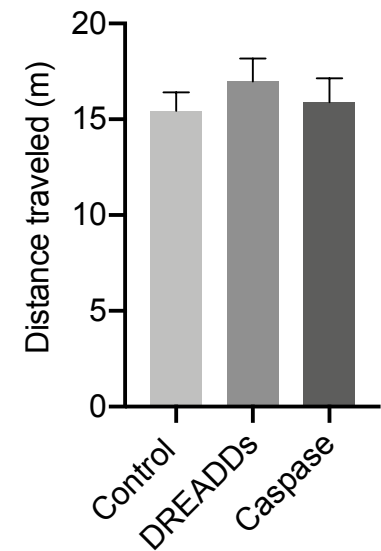

835 **Figure 3. Neither reversible nor chronic CA1v to LS neural disconnection impair spatial**  
836 **memory for escape location, social transmission of food preference, anxiety-like behavior,**  
837 **or general locomotor activity levels.** Diagram of the social transmission of food preference  
838 (STFP) task (A). Neither reversible nor chronic disconnection of the CA1v to LS pathway impair  
839 STFP learning compared to controls, as measured by a food preference ratio (B), with the dotted  
840 line indicating chance preference level (0.50). Diagram of the zero maze apparatus (C). Anxiety-  
841 like behavior was not influenced by reversible or chronic disconnection of the CA1v to LS  
842 pathway compared to controls, as measured by performance in the zero maze task, specifically  
843 time in open zones (D) and entries into open zones (E). Neither chronic nor reversible CA1v to  
844 LS disconnection affected open field performance compared to controls, as measured by total  
845 distance traveled (F). For graphs 3B, 3D, and 3E (CA1v to LS disconnect cohort 1), DREADDs  
846 n=6, caspase n=10, control n=8. For graph 3F (CA1v to LS disconnect cohort 2), DREADDs  
847 n=8, caspase n=12, control n=10. All values expressed as mean +/- SEM.  
848  
849



# Figure 4

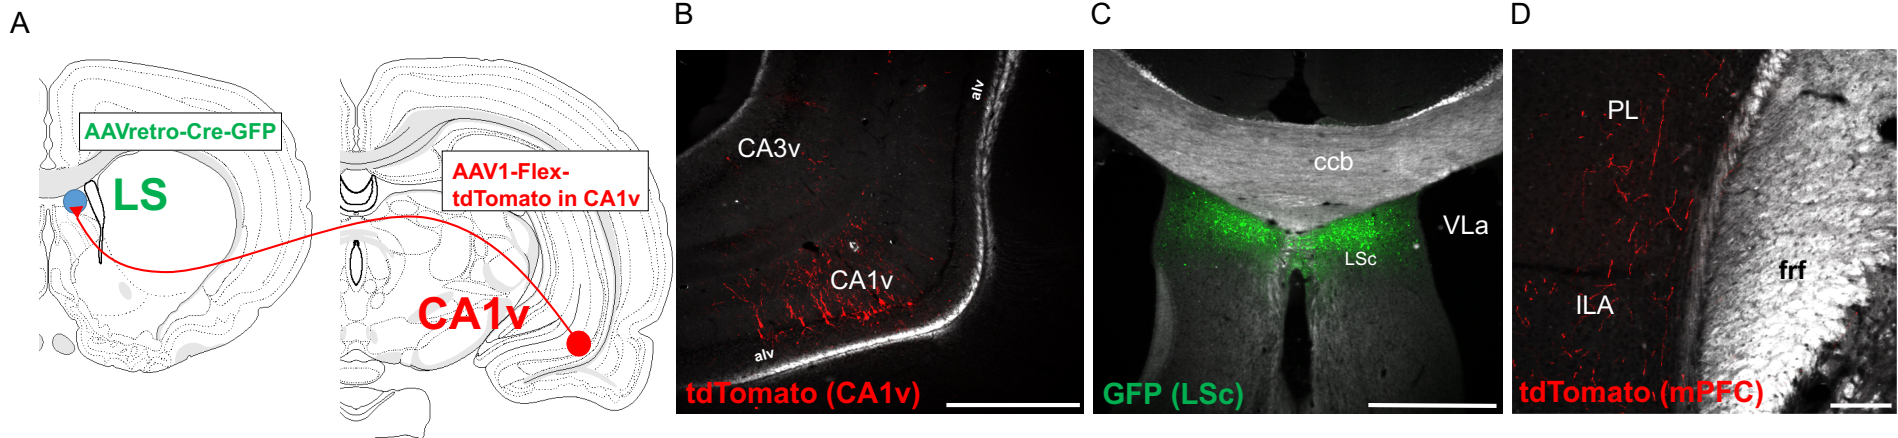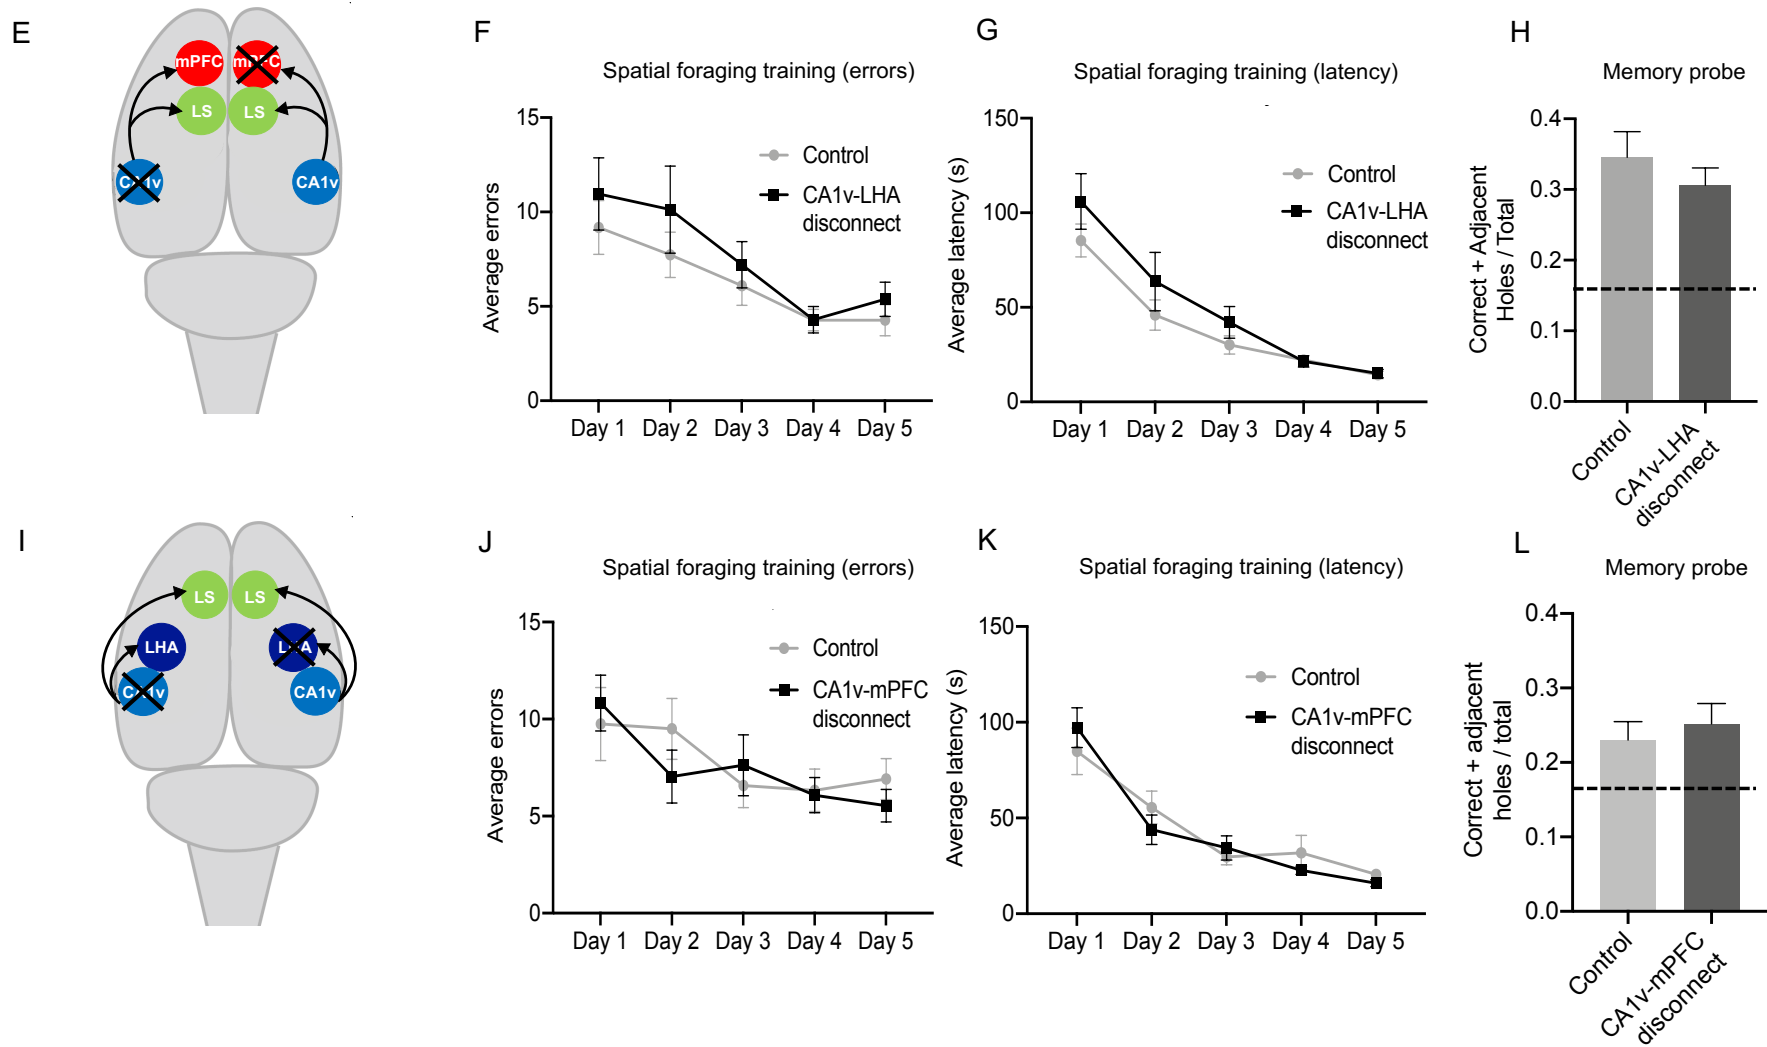



850 **Figure 4. Neither CA1v to mPFC nor CA1v to LHA disconnection impairs spatial memory**  
851 **for food location.** Diagram of dual viral approach to identify collateral targets of the CA1v to  
852 LS neural pathway (A). Representative CA1v injection site from collateral identification  
853 approach (B; scale bar 500 $\mu$ m). Representative LS injection site from collateral identification  
854 approach (C; scale bar 500 $\mu$ m). Representative image collateral axons of the CA1v to LS  
855 pathway located in the mPFC (D; scale bar 50 $\mu$ m). Diagram of contralesional approach to  
856 functionally disconnect the CA1v to mPFC neural pathway (E). Disconnection of the CA1v to  
857 mPFC neural pathway did not influence learning of the spatial foraging task compared to  
858 controls, as measured by errors before correct hole during training (F) and latency to correct hole  
859 during training (G). Disconnection of the CA1v to mPFC pathway did not influence retention of  
860 the spatial foraging task in the memory probe (H). Diagram of contralesional approach to  
861 functionally disconnect the CA1v to LHA neural pathway (I). Disconnection of the CA1v to  
862 LHA neural pathway did not influence learning of the spatial foraging task compared to controls,  
863 as measured by errors before correct hole during training (J) and latency to correct hole during  
864 training (K). Disconnection of the CA1v to LHA pathway did not influence retention of the  
865 spatial foraging task in the memory probe (L). For graphs 4F-I, CA1v to mPFC disconnect n=12,  
866 control n=12. For graphs 4K-N, CA1v to LHA disconnect n=12, control n=11. All values  
867 expressed as mean +/- SEM.  
868  
869

**Figure 5**

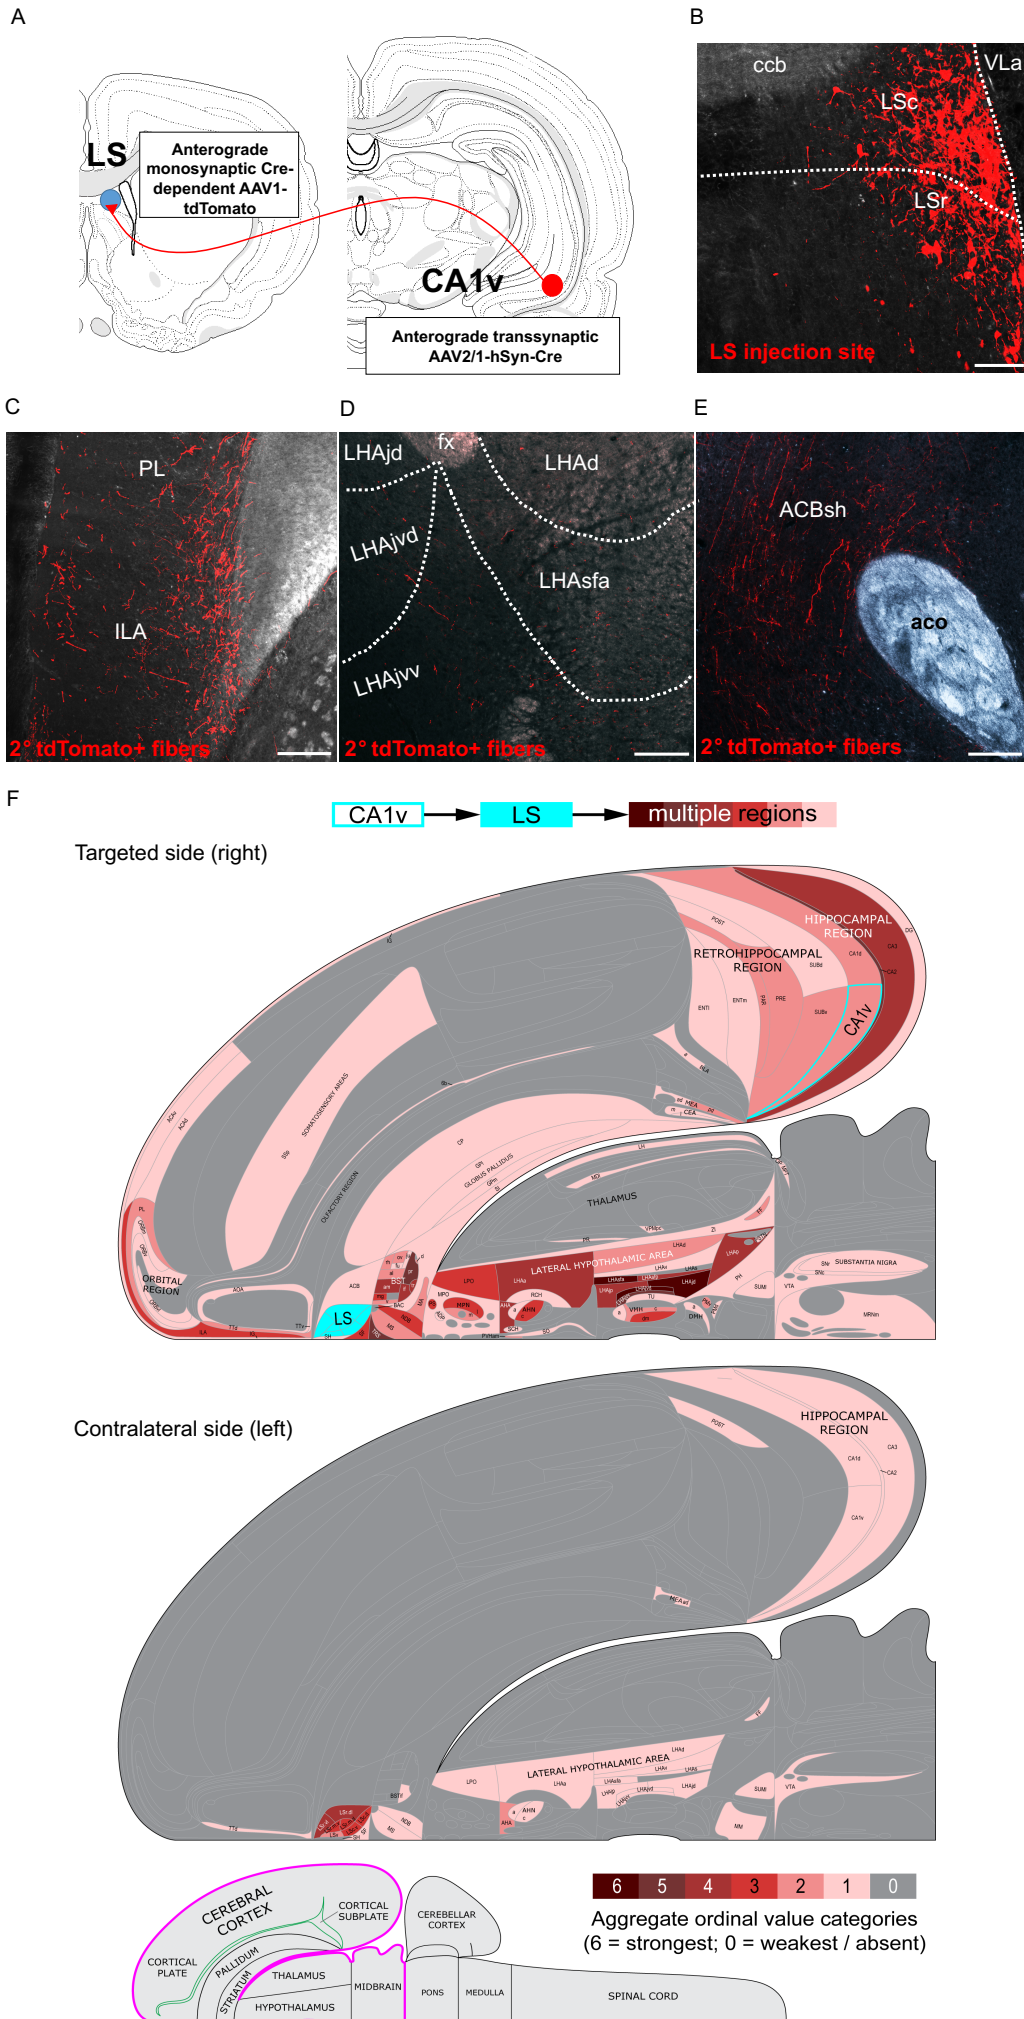

870 **Figure 5. Identification of second-order neural projections downstream of CA1v to LS**  
871 **projections.** Diagram of dual viral approach to identify brain regions that are second-order (2°)  
872 targets of the CA1v to LS neural pathway (A). Representative LS injection site from second  
873 order identification approach (B; scale bar 100µm). Representative image of second-order fibers  
874 of the CA1v to LS pathway within the mPFC (C; scale bar 200µm). Representative image of  
875 second-order fibers of the CA1v to LS pathway within the LHA (D; scale bar 200µm).  
876 Representative image of second-order fibers of the CA1v to LS pathway within the ACB (E;  
877 scale bar 200µm). Summary of the projection targets of LS neurons that receive input from  
878 CA1v (F). The outputs of the right side of LS neurons receiving CA1v input are represented at  
879 the macroscale (gray matter region resolution) on a partial flatmap representation of the rat  
880 forebrain, adapted from (65). Connection weights are represented block colors for each region  
881 following an ordinal scale ranging from weakest (0 = very weak or absent) to strongest (6 =  
882 strong), as there were no 7 (very strong) values. The inset at lower left represents one side of the  
883 brain with the part represented in the upper diagrams outlined in magenta.

884

885

886 **SUPPLEMENTARY INFORMATION**

887

888

# Supplemental Figure 1

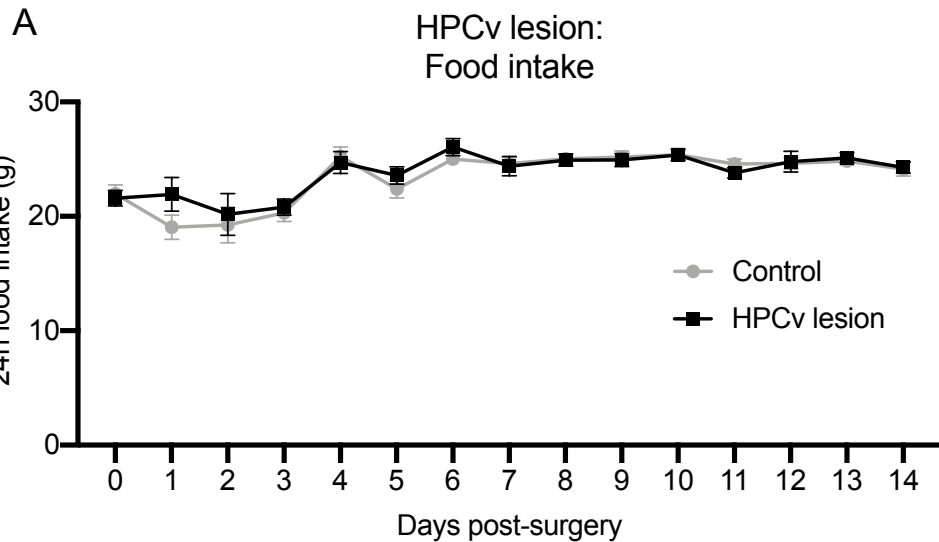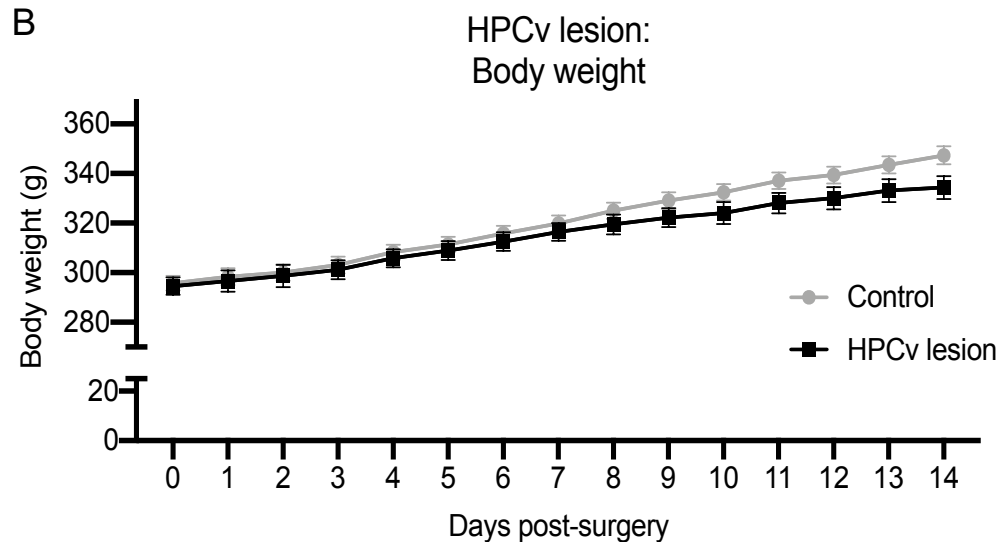

889 **Supplementary Figure 1. Effect of bilateral HPCv lesions on food intake and body weight.**

890 There were no effects on food intake (A) or body weight (B) of bilateral HPCv lesions compared  
891 to controls. Lesion n = 11, control n = 18. All values expressed as mean +/- SEM.

892

893

# Supplemental Figure 2

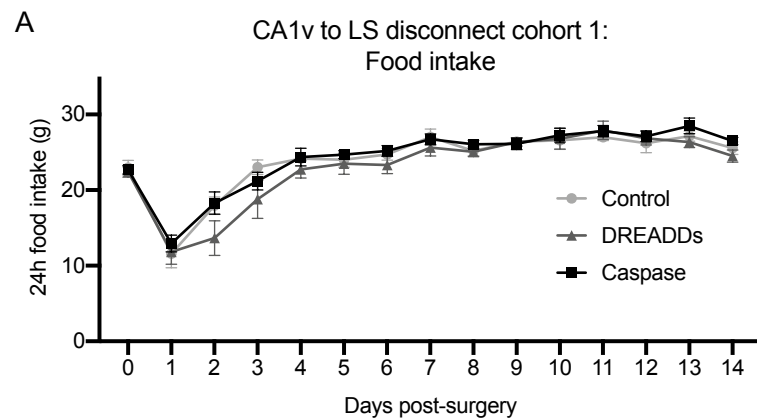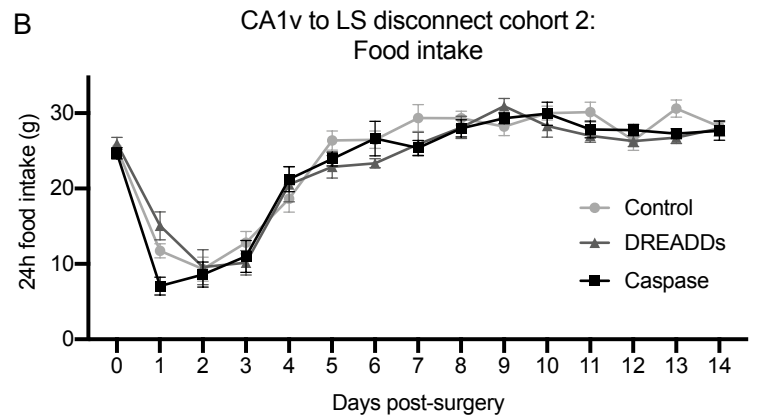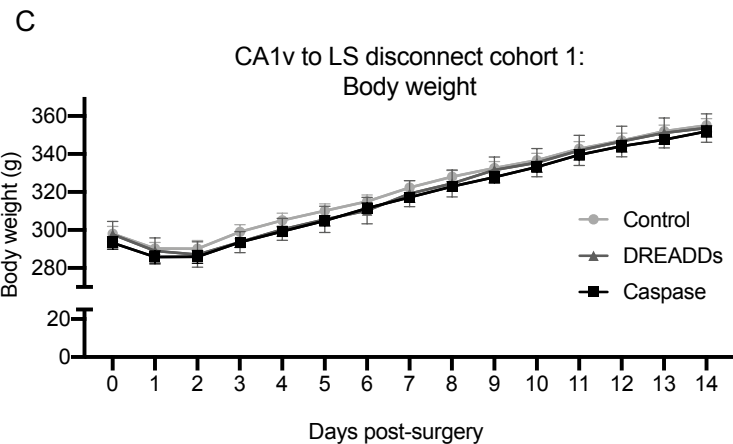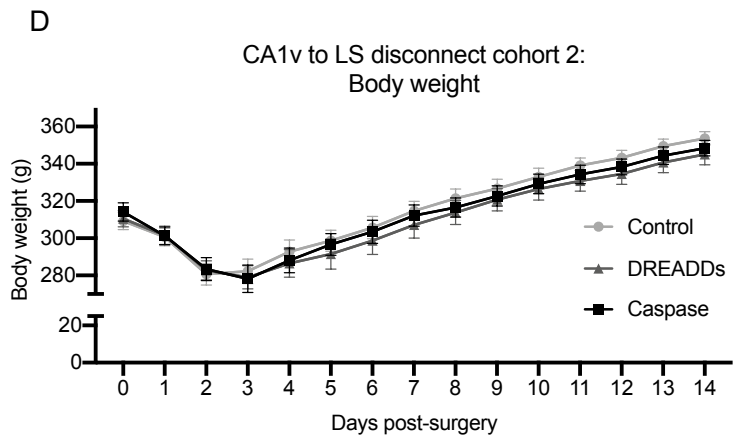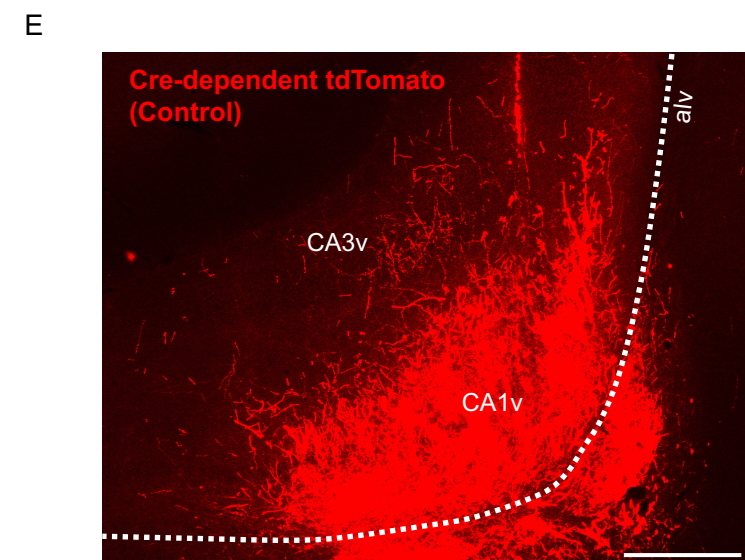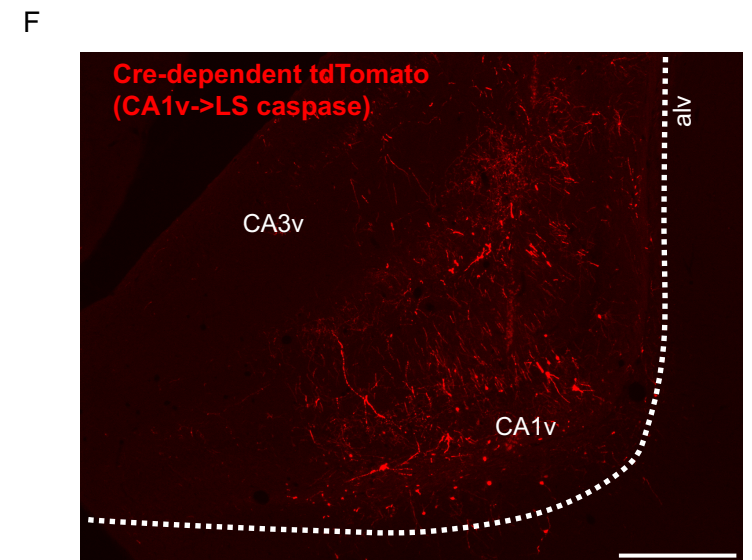



894 **Supplementary Figure 2. Effect of reversible and chronic disconnection of the CA1v to LS**  
895 **neural pathway on food intake and body weight, and verification of the chronic approach.**

896 There were no effects on food intake (cohort 1: A; cohort 2: B) or body weight (cohort 1: C;  
897 cohort 2: D) of reversible (DREADDs) or chronic (caspase) disconnection of the CA1v to LS  
898 neural pathway compared to controls. Histological verification of the dual viral approach  
899 demonstrates that cre-dependent tdTomato labeling of CA1v neurons induced by LS-origin retro-  
900 cre is robust in a control animal (E), but reduced in an animal injected with cre-dependent  
901 caspase combined with cre-dependent tdTomato due to caspase-induced cell death (F). For  
902 graphs S1A-B (CA1v to LS disconnect cohort 1), DREADDs n=6, caspase n=10, control n=8.  
903 For graphs S1C-D (CA1v to LS disconnect cohort 2), DREADDs n=8, caspase n=12, control  
904 n=10. All values expressed as mean +/- SEM.

905

# Supplemental Figure 3

## Chronic Disconnection of the vCA1-LS Pathway

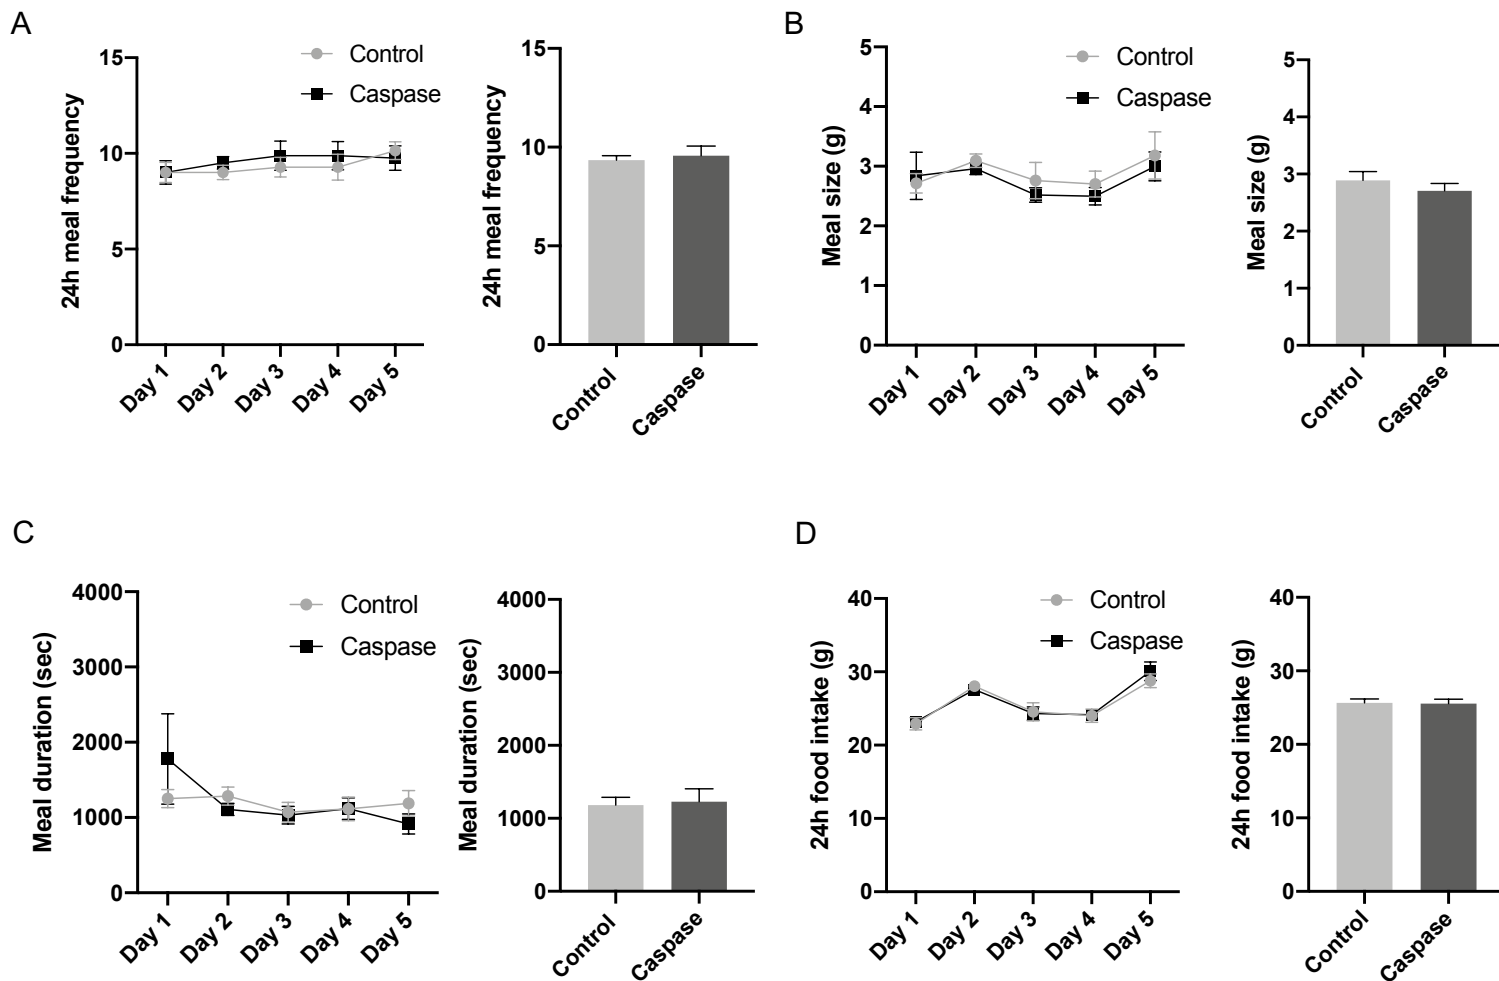

## Acute Disconnection of the vCA1-LS Pathway

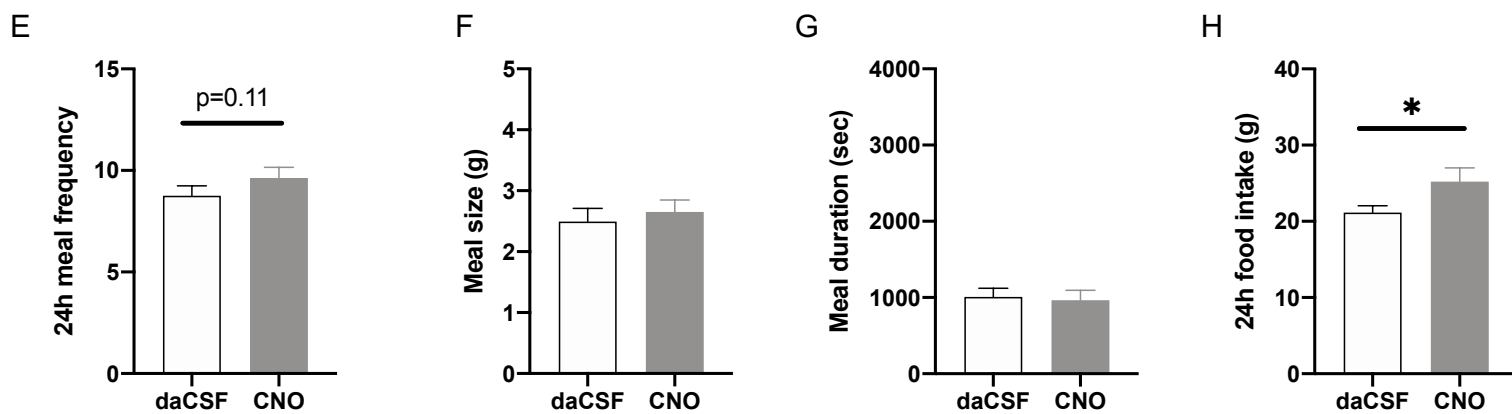

906 **Supplementary Figure 3. Effect of reversible and chronic disconnection of CA1v to LS**  
907 **neural pathway on feeding behavior.** Compared with control animals, chronic caspase-  
908 mediated disconnection of the CA1v to LS pathway did not significantly affect meal frequency  
909 (A), meal size (B), meal duration (C), or 24h cumulative food intake (D) over the course of the  
910 5-day recording period. Acute DREADDs-mediated disconnection of the CA1v to LS pathway  
911 (via CNO infusion) resulted in non-significant trend towards increased meal frequency (E), no  
912 differences in meal size (F) or meal duration (G), and a significant increase in 24h cumulative  
913 food intake (H) in comparison with vehicle injection. All values expressed as mean +/- SEM.  
914

# Supplemental Figure 4

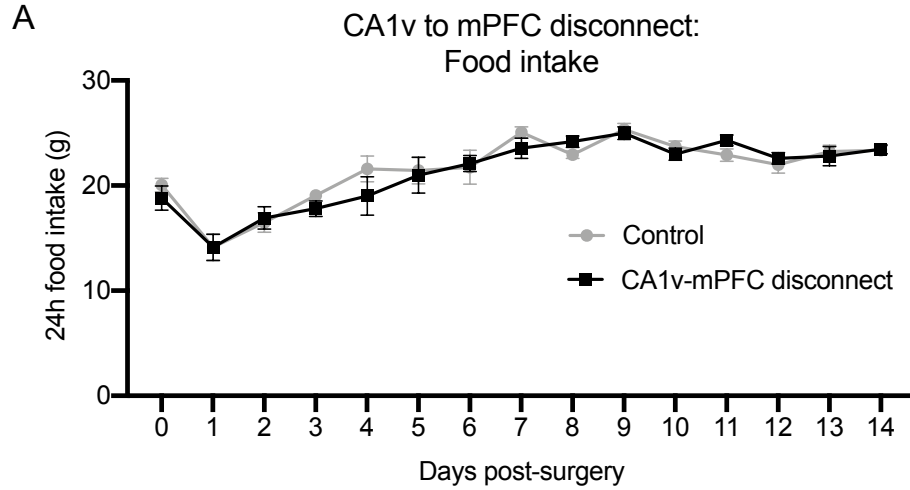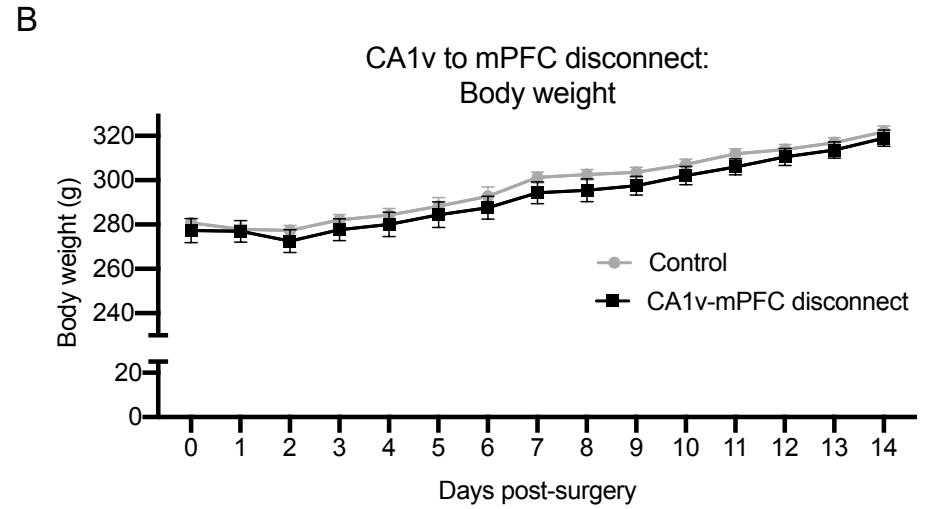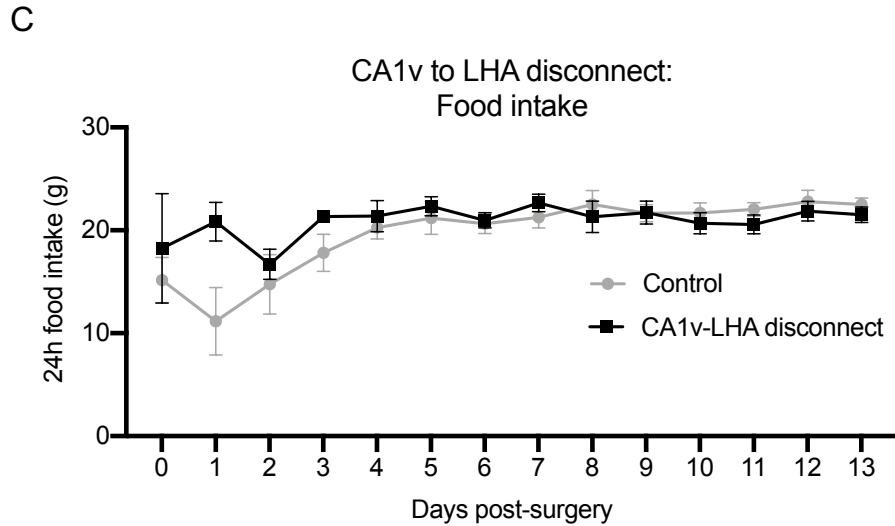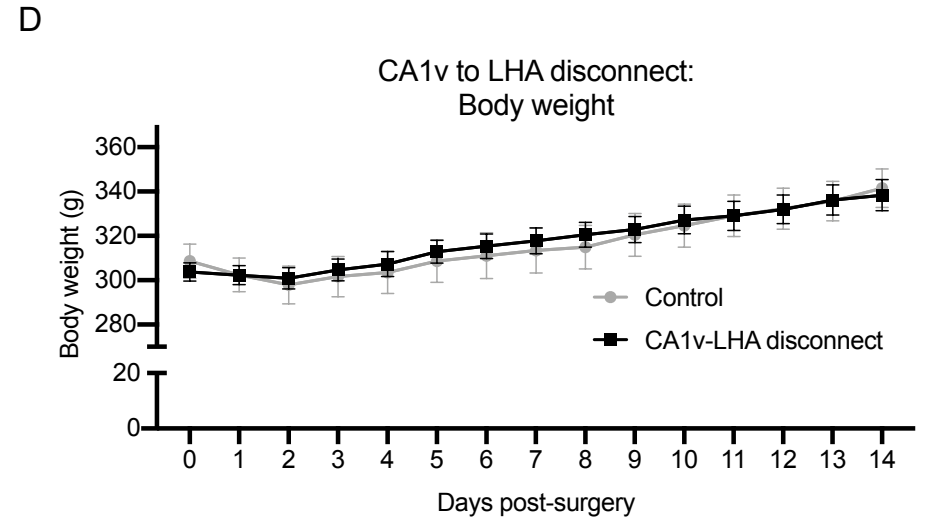

915 **Supplementary Figure 4. Effect of contralesional disconnection methods on food intake and**  
916 **body weight.** There were no effects on food intake (A) or body weight (B) of contralesional  
917 CA1v to mPFC compared to controls. CA1v to mPFC disconnect n=12, control n=12. There  
918 were no effects on food intake (C) or body weight (D) of contralesional CA1v to LHA compared  
919 to controls. CA1v to LHA disconnect n=12, control n=11. All values expressed as mean +/-  
920 SEM.

921

922

928 **REFERENCES**

929

- 930 1. R. D'Hooge, P. P. De Deyn, Applications of the Morris water maze in the study of  
931 learning and memory. *Brain Res Brain Res Rev* **36**, 60-90 (2001).
- 932 2. K. Gawel, E. Gibula, M. Marszalek-Grabska, J. Filarowska, J. H. Kotlinska, Assessment of  
933 spatial learning and memory in the Barnes maze task in rodents-methodological  
934 consideration. *Naunyn Schmiedebergs Arch Pharmacol* **392**, 1-18 (2019).
- 935 3. R. G. M. Morris, U. Frey, "Hippocampal synaptic plasticity: Role in spatial learning or the  
936 automatic recording of attended experience?" in Burgess, Neil (Ed); Jeffery, Kathryn J  
937 (Ed); et al (1999) *The hippocampal and parietal foundations of spatial cognition*. (Oxford  
938 University Press, U Edinburgh, Ctr for Neuroscience, Edinburgh, Scotland London, 1999),  
939 pp. 220-246.
- 940 4. D. C. Rowland, Y. Roudi, M. B. Moser, E. I. Moser, Ten Years of Grid Cells. *Annu Rev*  
941 *Neurosci* **39**, 19-40 (2016).
- 942 5. R. Morris, Developments of a water-maze procedure for studying spatial learning in the  
943 rat. *Journal of neuroscience methods* **11**, 47-60 (1984).
- 944 6. C. A. Barnes, Memory deficits associated with senescence: a neurophysiological and  
945 behavioral study in the rat. *J Comp Physiol Psychol* **93**, 74-104 (1979).
- 946 7. J. O'Keefe, J. Dostrovsky, The hippocampus as a spatial map: preliminary evidence from  
947 unit activity in the freely-moving rat. *Brain research* (1971).
- 948 8. T. Hafting, M. Fyhn, S. Molden, M. B. Moser, E. I. Moser, Microstructure of a spatial map  
949 in the entorhinal cortex. *Nature* **436**, 801-806 (2005).
- 950 9. M. S. Fanselow, H.-W. Dong, Are the dorsal and ventral hippocampus functionally  
951 distinct structures? *Neuron* **65**, 7-19 (2010).
- 952 10. A. T. Keinath *et al.*, Precise spatial coding is preserved along the longitudinal  
953 hippocampal axis. *Hippocampus* **24**, 1533-1548 (2014).
- 954 11. K. B. Kjelstrup *et al.*, Finite scale of spatial representation in the hippocampus. *Science*  
955 **321**, 140-143 (2008).
- 956 12. L. de Hoz, J. Knox, R. G. Morris, Longitudinal axis of the hippocampus: both septal and  
957 temporal poles of the hippocampus support water maze spatial learning depending on  
958 the training protocol. *Hippocampus* **13**, 587-603 (2003).
- 959 13. J. Ferbinteanu, C. Ray, R. J. McDonald, Both dorsal and ventral hippocampus contribute  
960 to spatial learning in Long-Evans rats. *Neurosci Lett* **345**, 131-135 (2003).
- 961 14. M. B. Moser, E. I. Moser, Functional differentiation in the hippocampus. *Hippocampus* **8**,  
962 608-619 (1998).
- 963 15. S. E. Kanoski, H. J. Grill, Hippocampus Contributions to Food Intake Control: Mnemonic,  
964 Neuroanatomical, and Endocrine Mechanisms. *Biol Psychiatry* **81**, 748-756 (2017).
- 965 16. P. G. Henke, Hippocampal pathway to the amygdala and stress ulcer development. *Brain*  
966 *Res Bull* **25**, 691-695 (1990).
- 967 17. K. G. Kjelstrup *et al.*, Reduced fear expression after lesions of the ventral hippocampus.  
968 *Proceedings of the National Academy of Sciences* **99**, 10825-10830 (2002).

- 969 18. S. Gaskin, A. Gamliel, M. Tardif, E. Cole, D. G. Mumby, Incidental (unreinforced) and  
970 reinforced spatial learning in rats with ventral and dorsal lesions of the hippocampus.  
971 *Behav Brain Res* **202**, 64-70 (2009).
- 972 19. M. S. Bienkowski *et al.*, Integration of gene expression and brain-wide connectivity  
973 reveals the multiscale organization of mouse hippocampal networks. *Nat Neurosci* **21**,  
974 1628-1643 (2018).
- 975 20. R. Hannapel *et al.*, Postmeal Optogenetic Inhibition of Dorsal or Ventral Hippocampal  
976 Pyramidal Neurons Increases Future Intake. *eNeuro* **6** (2019).
- 977 21. R. C. Hannapel, Y. H. Henderson, R. Nalloor, A. Vazdarjanova, M. B. Parent, Ventral  
978 hippocampal neurons inhibit postprandial energy intake. *Hippocampus* **27**, 274-284  
979 (2017).
- 980 22. B. K. Mani *et al.*, Neuroanatomical characterization of a growth hormone secretagogue  
981 receptor-green fluorescent protein reporter mouse. *J Comp Neurol* **522**, 3644-3666  
982 (2014).
- 983 23. J. M. Zigman, J. E. Jones, C. E. Lee, C. B. Saper, J. K. Elmquist, Expression of ghrelin  
984 receptor mRNA in the rat and the mouse brain. *J Comp Neurol* **494**, 528-548 (2006).
- 985 24. I. Merchenthaler, M. Lane, P. Shughrue, Distribution of pre-pro-glucagon and glucagon-  
986 like peptide-1 receptor messenger RNAs in the rat central nervous system. *J Comp*  
987 *Neurol* **403**, 261-280 (1999).
- 988 25. S. E. Kanoski, S. M. Fortin, K. M. Ricks, H. J. Grill, Ghrelin signaling in the ventral  
989 hippocampus stimulates learned and motivational aspects of feeding via PI3K-Akt  
990 signaling. *Biol Psychiatry* **73**, 915-923 (2013).
- 991 26. S. E. Kanoski *et al.*, Hippocampal leptin signaling reduces food intake and modulates  
992 food-related memory processing. *Neuropsychopharmacology* **36**, 1859-1870 (2011).
- 993 27. T. M. Hsu *et al.*, A hippocampus to prefrontal cortex neural pathway inhibits food  
994 motivation through glucagon-like peptide-1 signaling. *Mol Psychiatry* **23**, 1555-1565  
995 (2018).
- 996 28. T. M. Hsu, J. D. Hahn, V. R. Konanur, A. Lam, S. E. Kanoski, Hippocampal GLP-1 receptors  
997 influence food intake, meal size, and effort-based responding for food through volume  
998 transmission. *Neuropsychopharmacology* **40**, 327-337 (2015).
- 999 29. A. N. Suarez, C. M. Liu, A. M. Cortella, E. E. Noble, S. E. Kanoski, Ghrelin and Orexin  
1000 Interact to Increase Meal Size Through a Descending Hippocampus to Hindbrain  
1001 Signaling Pathway. *Biol Psychiatry* **87**, 1001-1011 (2020).
- 1002 30. G. D. Petrovich, N. S. Canteras, L. W. Swanson, Combinatorial amygdalar inputs to  
1003 hippocampal domains and hypothalamic behavior systems. *Brain research reviews* **38**,  
1004 247-289 (2001).
- 1005 31. C. De La Rosa-Prieto *et al.*, Subicular and CA1 hippocampal projections to the accessory  
1006 olfactory bulb. *Hippocampus* **19**, 124-129 (2009).
- 1007 32. T. M. Hsu *et al.*, Hippocampus ghrelin receptor signaling promotes socially-mediated  
1008 learned food preference. *Neuropharmacology* **131**, 487-496 (2018).
- 1009 33. L. W. Swanson, W. M. Cowan, An autoradiographic study of the organization of the  
1010 efferent connections of the hippocampal formation in the rat. *J Comp Neurol* **172**, 49-84  
1011 (1977).



- 1012 34. T. M. Hsu *et al.*, Hippocampus ghrelin signaling mediates appetite through lateral  
1013 hypothalamic orexin pathways. *Elife* **4** (2015).
- 1014 35. A. Arszovszki, Z. Borhegyi, T. Klausberger, Three axonal projection routes of individual  
1015 pyramidal cells in the ventral CA1 hippocampus. *Front Neuroanat* **8**, 53 (2014).
- 1016 36. P. Y. Risold, L. W. Swanson, Structural evidence for functional domains in the rat  
1017 hippocampus. *Science (New York, N.Y.)* **272**, 1484-1486 (1996).
- 1018 37. P. Sweeney, Y. Yang, An excitatory ventral hippocampus to lateral septum circuit that  
1019 suppresses feeding. *Nat Commun* **6**, 10188 (2015).
- 1020 38. R. Garcia, R. M. Vouimba, R. Jaffard, Spatial discrimination learning induces LTP-like  
1021 changes in the lateral septum of mice. *Neuroreport: An International Journal for the*  
1022 *Rapid Communication of Research in Neuroscience* **5**, 329-332 (1993).
- 1023 39. R. Jaffard, R. M. Vouimba, A. Marighetto, R. Garcia, Long-term potentiation and long-  
1024 term depression in the lateral septum in spatial working and reference memory. *J*  
1025 *Physiol Paris* **90**, 339-341 (1996).
- 1026 40. S. J. Terrill *et al.*, Nucleus accumbens melanin-concentrating hormone signaling  
1027 promotes feeding in a sex-specific manner. *Neuropharmacology* **178**, 108270 (2020).
- 1028 41. A. Carballo-Marquez, A. Vale-Martinez, G. Guillazo-Blanch, M. Marti-Nicolovius,  
1029 Muscarinic receptor blockade in ventral hippocampus and prelimbic cortex impairs  
1030 memory for socially transmitted food preference. *Hippocampus* **19**, 446-455 (2009).
- 1031 42. R. A. Countryman, N. L. Kaban, P. J. Colombo, Hippocampal c-fos is necessary for long-  
1032 term memory of a socially transmitted food preference. *Neurobiol Learn Mem* **84**, 175-  
1033 183 (2005).
- 1034 43. G. M. Parfitt *et al.*, Bidirectional Control of Anxiety-Related Behaviors in Mice: Role of  
1035 Inputs Arising from the Ventral Hippocampus to the Lateral Septum and Medial  
1036 Prefrontal Cortex. *Neuropsychopharmacology : official publication of the American*  
1037 *College of Neuropsychopharmacology* **42**, 1715-1728 (2017).
- 1038 44. N. L. Trent, J. L. Menard, The ventral hippocampus and the lateral septum work in  
1039 tandem to regulate rats' open-arm exploration in the elevated plus-maze. *Physiology &*  
1040 *behavior* **101**, 141-152 (2010).
- 1041 45. J. C. Jimenez *et al.*, Anxiety Cells in a Hippocampal-Hypothalamic Circuit. *Neuron* **97**,  
1042 670-683.e676 (2018).
- 1043 46. M. S. Fanselow, H. W. Dong, Are the dorsal and ventral hippocampus functionally  
1044 distinct structures? *Neuron* **65**, 7-19 (2010).
- 1045 47. M. Contreras, T. Pelc, M. Llofriu, A. Weitzenfeld, J. M. Fellous, The ventral hippocampus  
1046 is involved in multi-goal obstacle-rich spatial navigation. *Hippocampus* **28**, 853-866  
1047 (2018).
- 1048 48. S. L. T. Lee, D. Lew, V. Wickenheisser, E. J. Markus, Interdependence between dorsal and  
1049 ventral hippocampus during spatial navigation. *Brain Behav* **9**, e01410 (2019).
- 1050 49. D. P. Holschneider *et al.*, Cerebral perfusion mapping during retrieval of spatial memory  
1051 in rats. *Behavioural brain research* **375**, 112116 (2019).
- 1052 50. D. Olivo, M. Caba, F. Gonzalez-Lima, J. F. Rodríguez-Landa, A. A. Corona-Morales,  
1053 Metabolic activation of amygdala, lateral septum and accumbens circuits during food  
1054 anticipatory behavior. *Behav Brain Res* **316**, 261-270 (2017).

- 1055 51. M. Carus-Cadavieco *et al.*, Gamma oscillations organize top-down signalling to  
1056 hypothalamus and enable food seeking. *Nature* **542**, 232-236 (2017).
- 1057 52. S. J. Terrill *et al.*, Role of lateral septum glucagon-like peptide 1 receptors in food intake.  
1058 *American journal of physiology. Regulatory, integrative and comparative physiology* **311**,  
1059 R124-132 (2016).
- 1060 53. S. J. Terrill, K. D. Wall, N. D. Medina, C. B. Maske, D. L. Williams, Lateral septum growth  
1061 hormone secretagogue receptor affects food intake and motivation for sucrose  
1062 reinforcement. *American journal of physiology. Regulatory, integrative and comparative*  
1063 *physiology* **315**, R76-r83 (2018).
- 1064 54. C. Wang, C. M. Kotz, Urocortin in the lateral septal area modulates feeding induced by  
1065 orexin A in the lateral hypothalamus. *American journal of physiology. Regulatory,*  
1066 *integrative and comparative physiology* **283**, R358-367 (2002).
- 1067 55. J. Hauser, L. H. Llano López, J. Feldon, P. A. Gargiulo, B. K. Yee, Small lesions of the dorsal  
1068 or ventral hippocampus subregions are associated with distinct impairments in working  
1069 memory and reference memory retrieval, and combining them attenuates the  
1070 acquisition rate of spatial reference memory. *Hippocampus* **30**, 938-957 (2020).
- 1071 56. D. S. Olton, The radial arm maze as a tool in behavioral pharmacology. *Physiology &*  
1072 *behavior* **40**, 793-797 (1987).
- 1073 57. H. H. Pothuizen, W. N. Zhang, A. L. Jongen-Rêlo, J. Feldon, B. K. Yee, Dissociation of  
1074 function between the dorsal and the ventral hippocampus in spatial learning abilities of  
1075 the rat: a within-subject, within-task comparison of reference and working spatial  
1076 memory. *The European journal of neuroscience* **19**, 705-712 (2004).
- 1077 58. L. E. Jarrard, L. P. Luu, T. L. Davidson, A study of hippocampal structure-function  
1078 relations along the septo-temporal axis. *Hippocampus* **22**, 680-692 (2012).
- 1079 59. L. W. Swanson, Brain maps 4.0-Structure of the rat brain: An open access atlas with  
1080 global nervous system nomenclature ontology and flatmaps. *J Comp Neurol* **526**, 935-  
1081 943 (2018).
- 1082 60. R. C. Ritter, P. G. Slusser, S. Stone, Glucoreceptors controlling feeding and blood glucose:  
1083 location in the hindbrain. *Science* **213**, 451-452 (1981).
- 1084 61. E. E. Noble *et al.*, Hypothalamus-hippocampus circuitry regulates impulsivity via  
1085 melanin-concentrating hormone. *Nat Commun* **10**, 4923 (2019).
- 1086 62. B. Zingg *et al.*, AAV-Mediated Anterograde Transsynaptic Tagging: Mapping  
1087 Corticocollicular Input-Defined Neural Pathways for Defense Behaviors. *Neuron* **93**, 33-  
1088 47 (2017).
- 1089 63. A. N. Suarez *et al.*, Gut vagal sensory signaling regulates hippocampus function through  
1090 multi-order pathways. *Nat Commun* **9**, 2181 (2018).
- 1091 64. J. D. Hahn, O. Sporns, A. G. Watts, L. W. Swanson, Macroscale intrinsic network  
1092 architecture of the hypothalamus. *Proc Natl Acad Sci U S A* **116**, 8018-8027 (2019).
- 1093 65. J. D. Hahn, Swanson, L. W., Bowman, I., Foster, N. N., Zingg, B., Bienkowski, M. S.,  
1094 Hintiryan, H., & Dong, H.-W. , An open access mouse brain flatmap and upgraded rat  
1095 and human brain flatmaps based on current reference atlases. *J. Comp. Neurol.* (2020).
- 1096 66. L. E. Herzog *et al.*, Interaction of Taste and Place Coding in the Hippocampus. *The*  
1097 *Journal of neuroscience : the official journal of the Society for Neuroscience* **39**, 3057-  
1098 3069 (2019).

- 1099 67. R. A. Countryman, P. E. Gold, Rapid forgetting of social transmission of food preferences  
1100 in aged rats: relationship to hippocampal CREB activation. *Learn Mem* **14**, 350-358  
1101 (2007).
- 1102 68. B. G. Galef, Jr., W. Y. Lee, E. E. Whiskin, Lack of interference in long-term memory for  
1103 socially learned food preferences in rats (*Rattus norvegicus*). *J Comp Psychol* **119**, 131-  
1104 135 (2005).
- 1105 69. B. G. Galef, Jr., E. E. Whiskin, Socially transmitted food preferences can be used to study  
1106 long-term memory in rats. *Learn Behav* **31**, 160-164 (2003).
- 1107
